# Supplementary material
Source: publisher figshare collection journal article supplement (https://tandf.figshare.com/ndownloader/files/19256945)
Supplement: Supplementary file 1 [file 19256945]

**Supporting Information**

Synthesis and evaluation of Zn(II) dithiocarbamate complexes as potential antibacterial, antibiofilm and antitumor agents

VINAY KUMAR MAURYA, ASHISH KUMAR SINGH, RAVI PRATAP SINGH, SHIVANGI YADAV, KRISHNA KUMAR, PRADYOT PRAKASH and LAL BAHADUR PRASAD*

**Table S1.** Analytical data of the complexes.

| **Complexes** | **Melting point (ºC)** | **Yield**  **(%)** | **Calculated (found) %** | | | |
| --- | --- | --- | --- | --- | --- | --- |
| **C** | **H** | **N** | **S** |
| C36H40N2S4Zn (**A1**) | 185-189 | 83 | 63.00(62.87) | 6.40(6.32) | 3.87(3.72) | 17.70(17.65) |
| C20H24N2S4Zn (**A2**) | 188-192 | 84 | 49.22(49.13) | 5.37(5.18) | 5.74(5.53) | 26.28(26.15) |
| C38H46O2N2S4Zn (**A3**) | 187-191 | 82 | 60.34(60.20) | 6.13(6.05) | 3.70(3.63) | 16.96(16.88) |
| C32H32N2S4Zn (**A4**) | 189-197 | 82 | 60.03(58.90) | 5.35(5.08) | 4.38(4.22) | 20.03(19.92) |


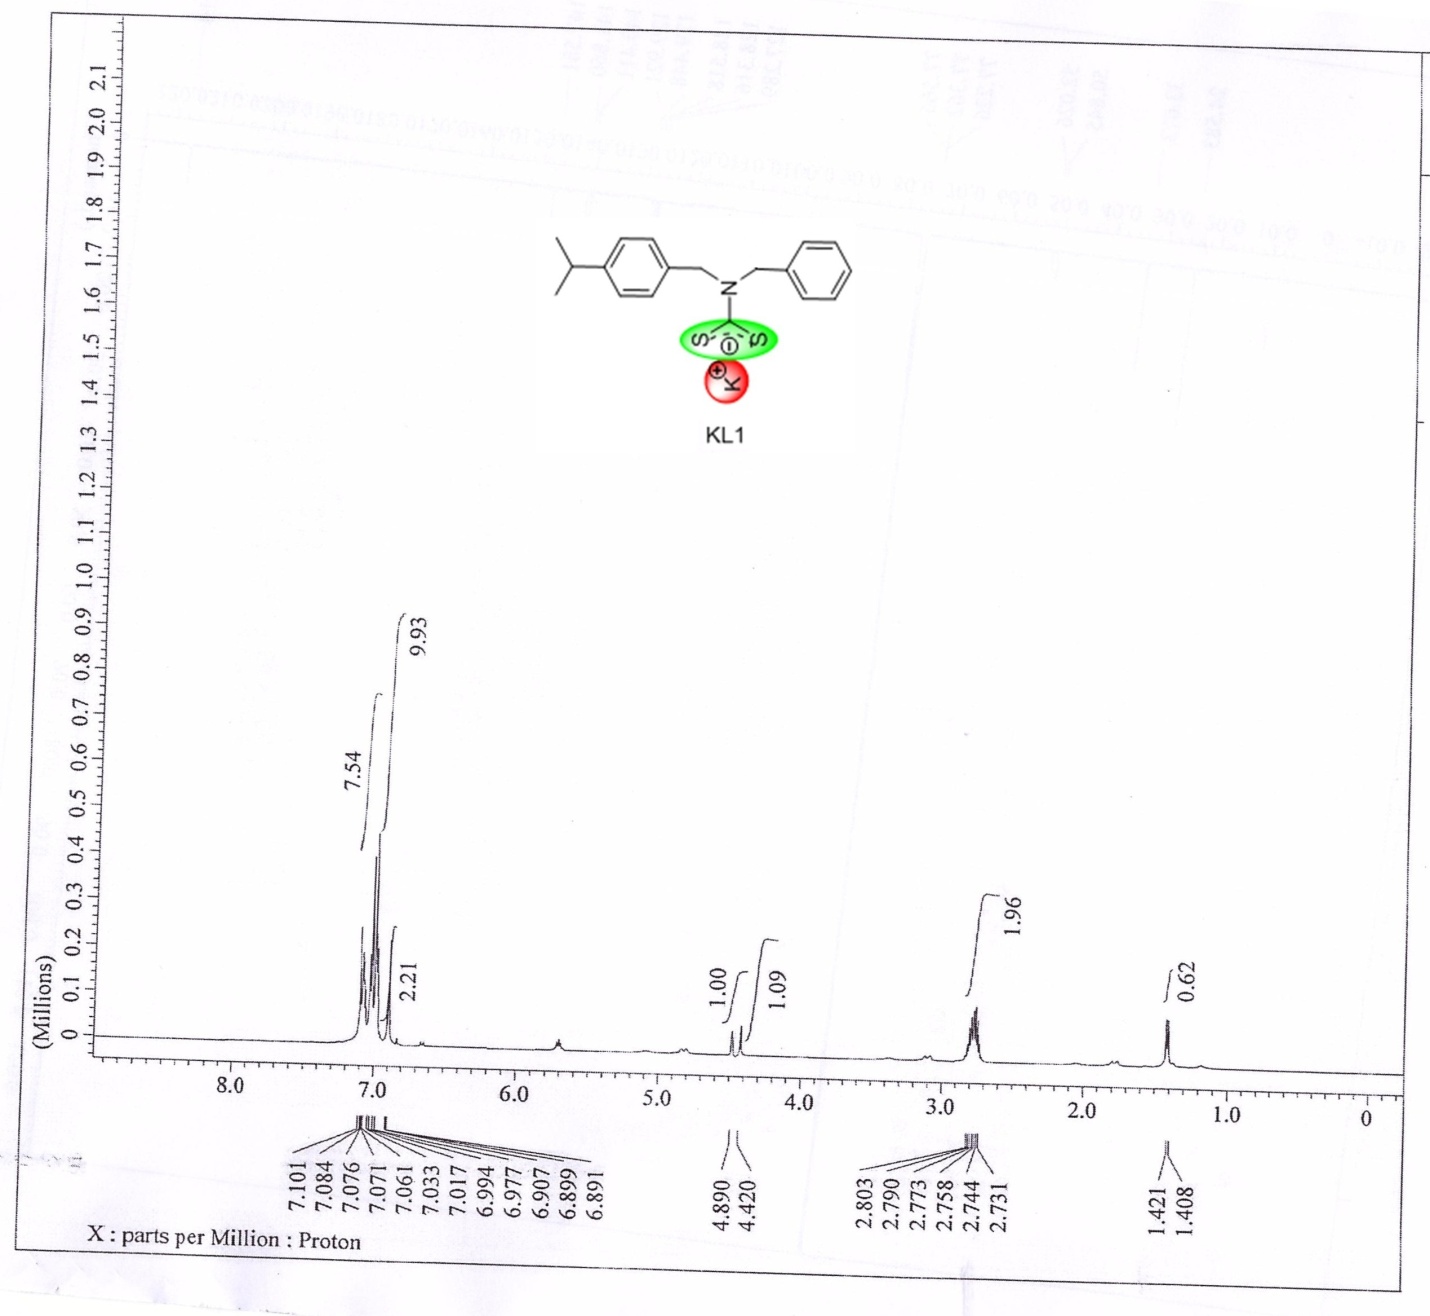


**Figure S1.** 1H NMR spectrum of **KL1** ligand.


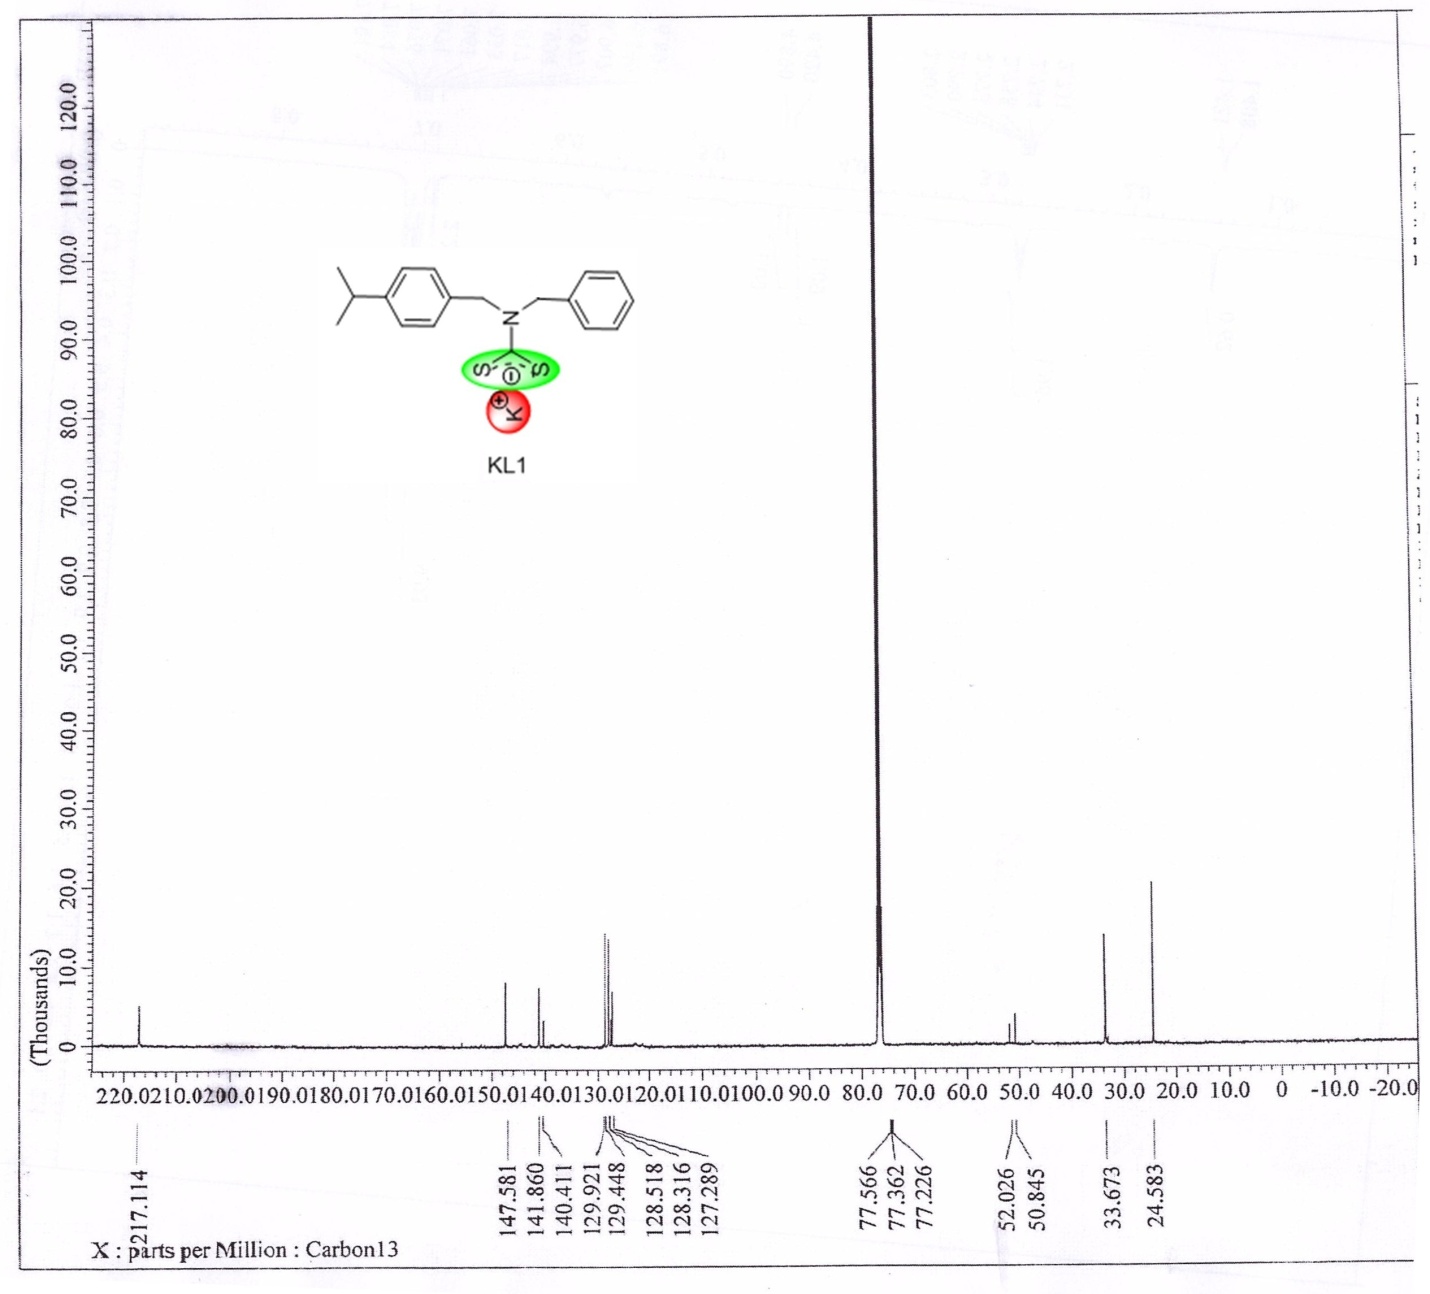


**Figure S2.** 13C NMR spectrum of **KL1** ligand.


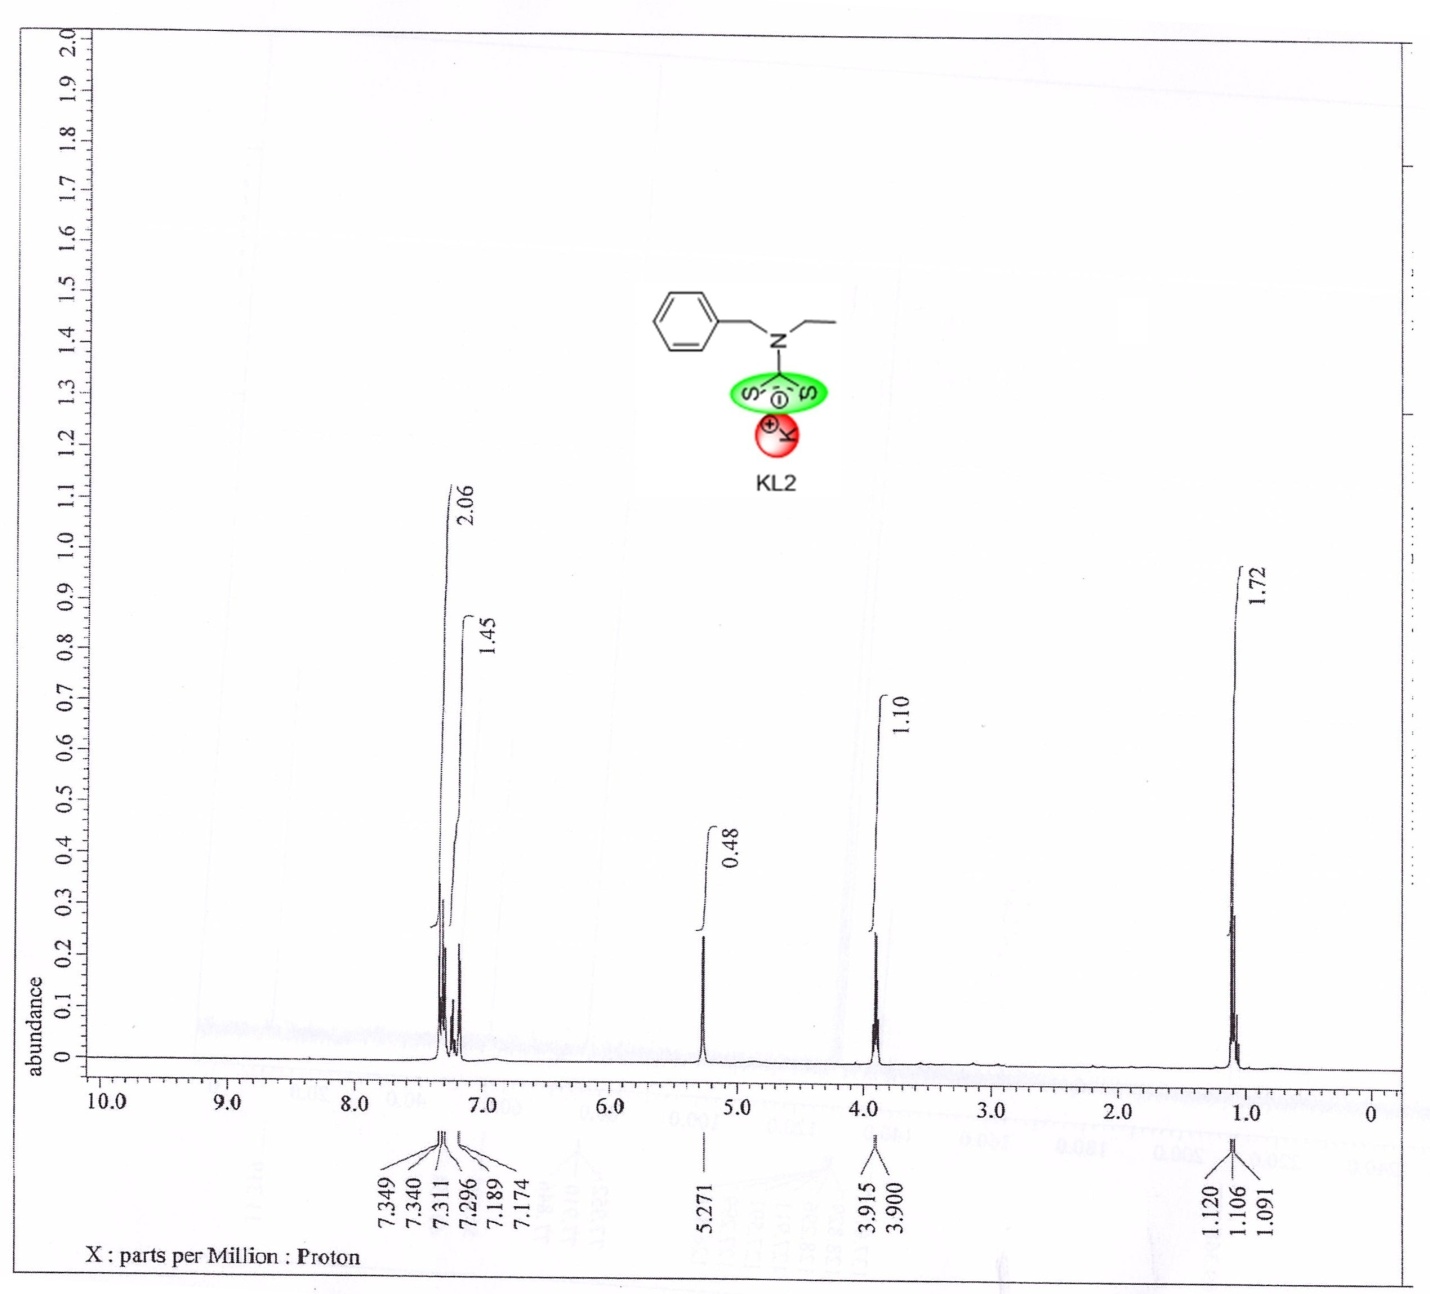


**Figure S3.** 1H NMR spectrum of **KL2** ligand.


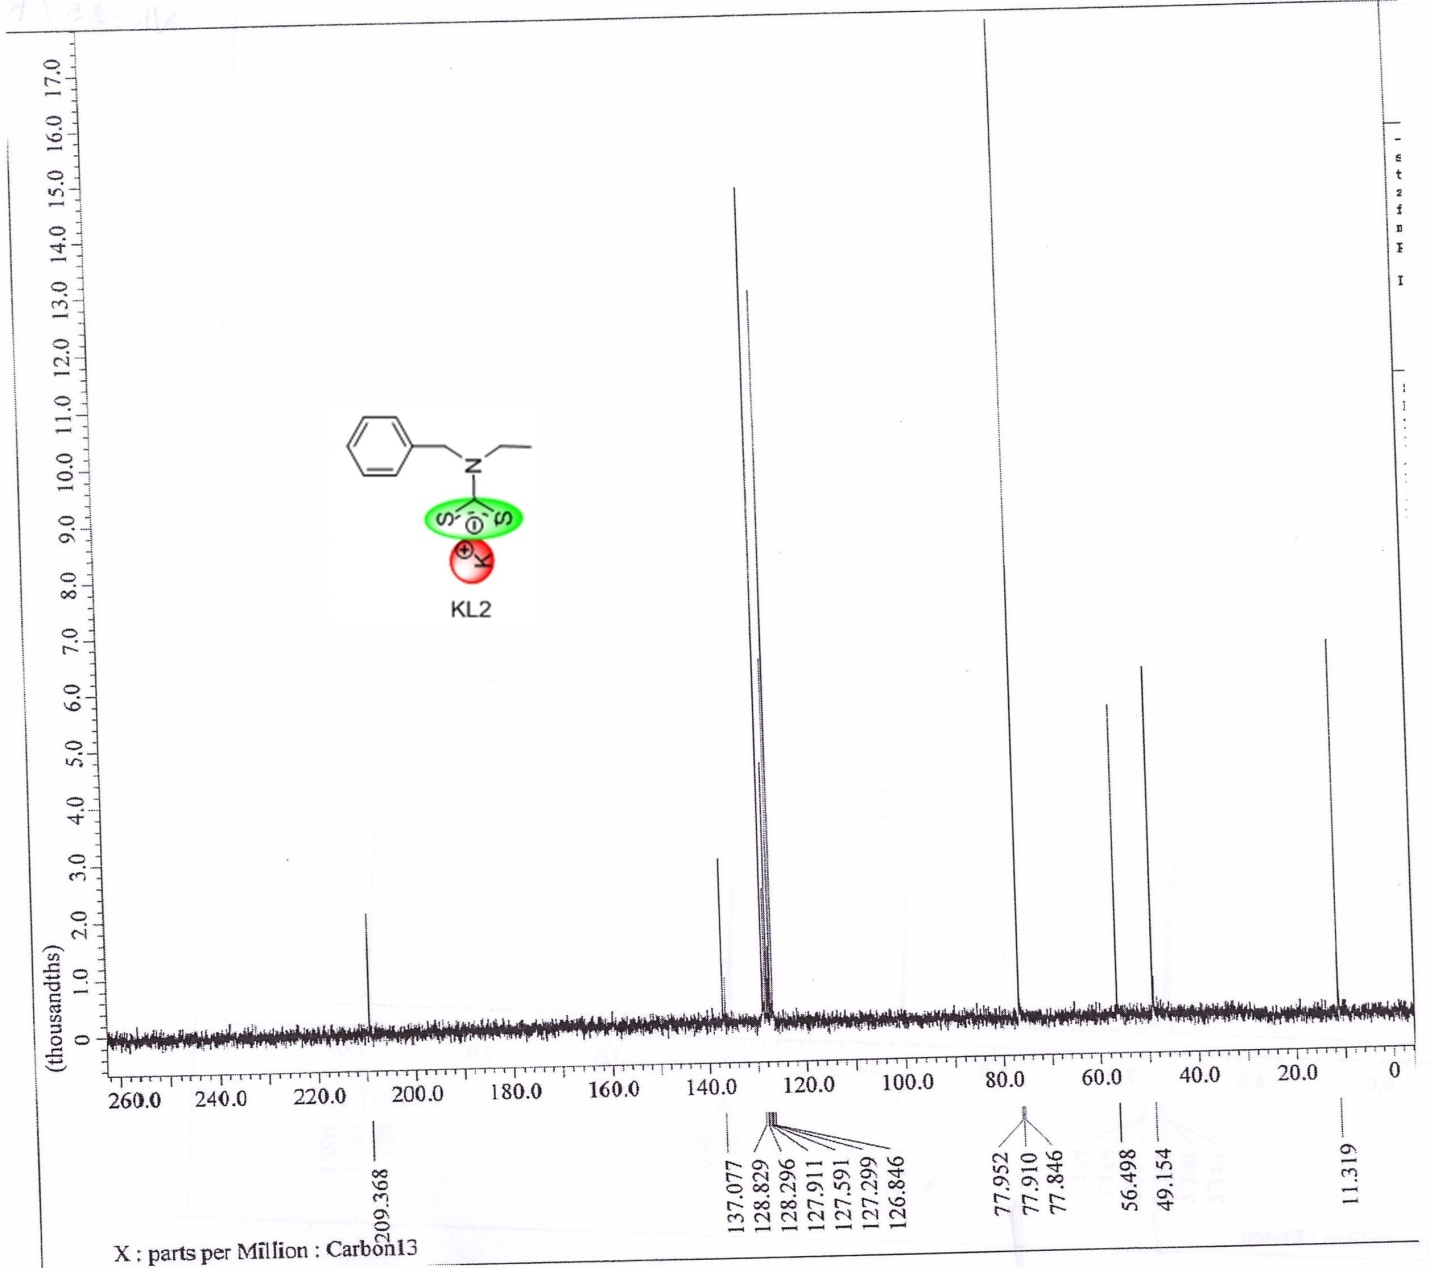


**Figure S4.** 13C NMR spectrum of **KL2** ligand.


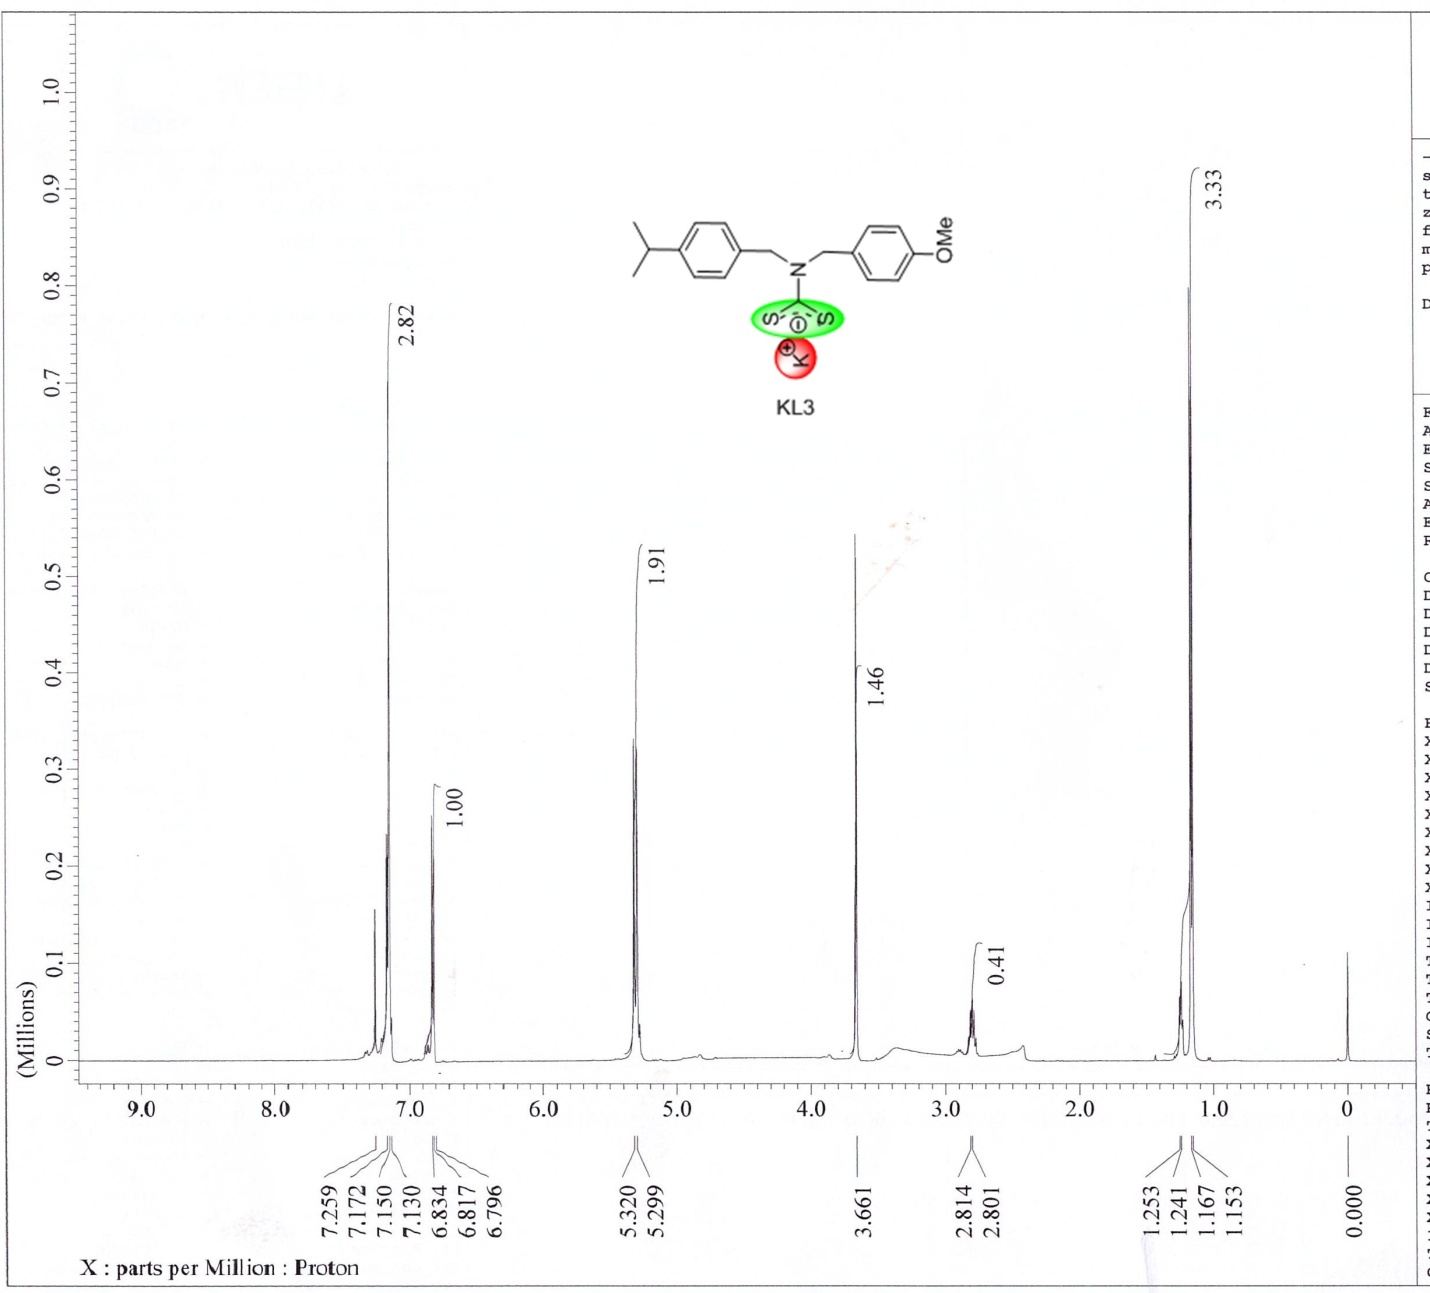


**Figure S5.** 1H NMR spectrum of **KL3** ligand.


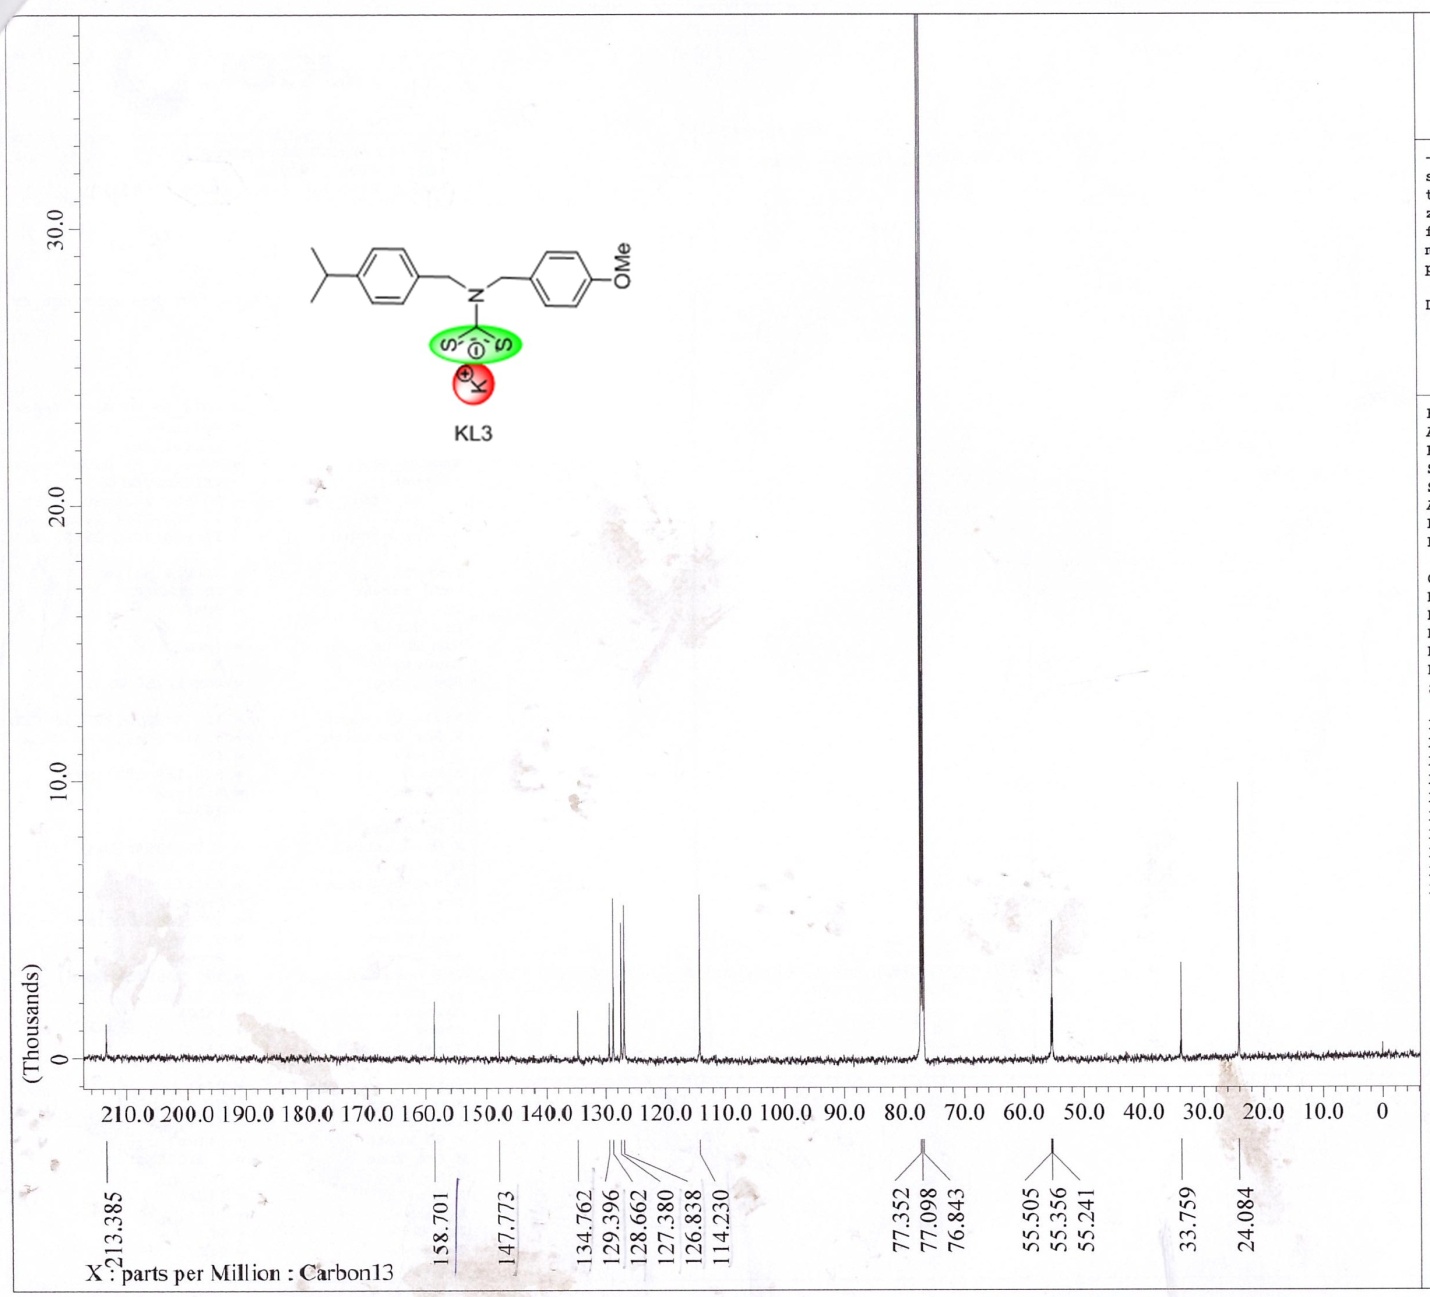


**Figure S6.** 13C NMR spectrum of **KL3** ligand.


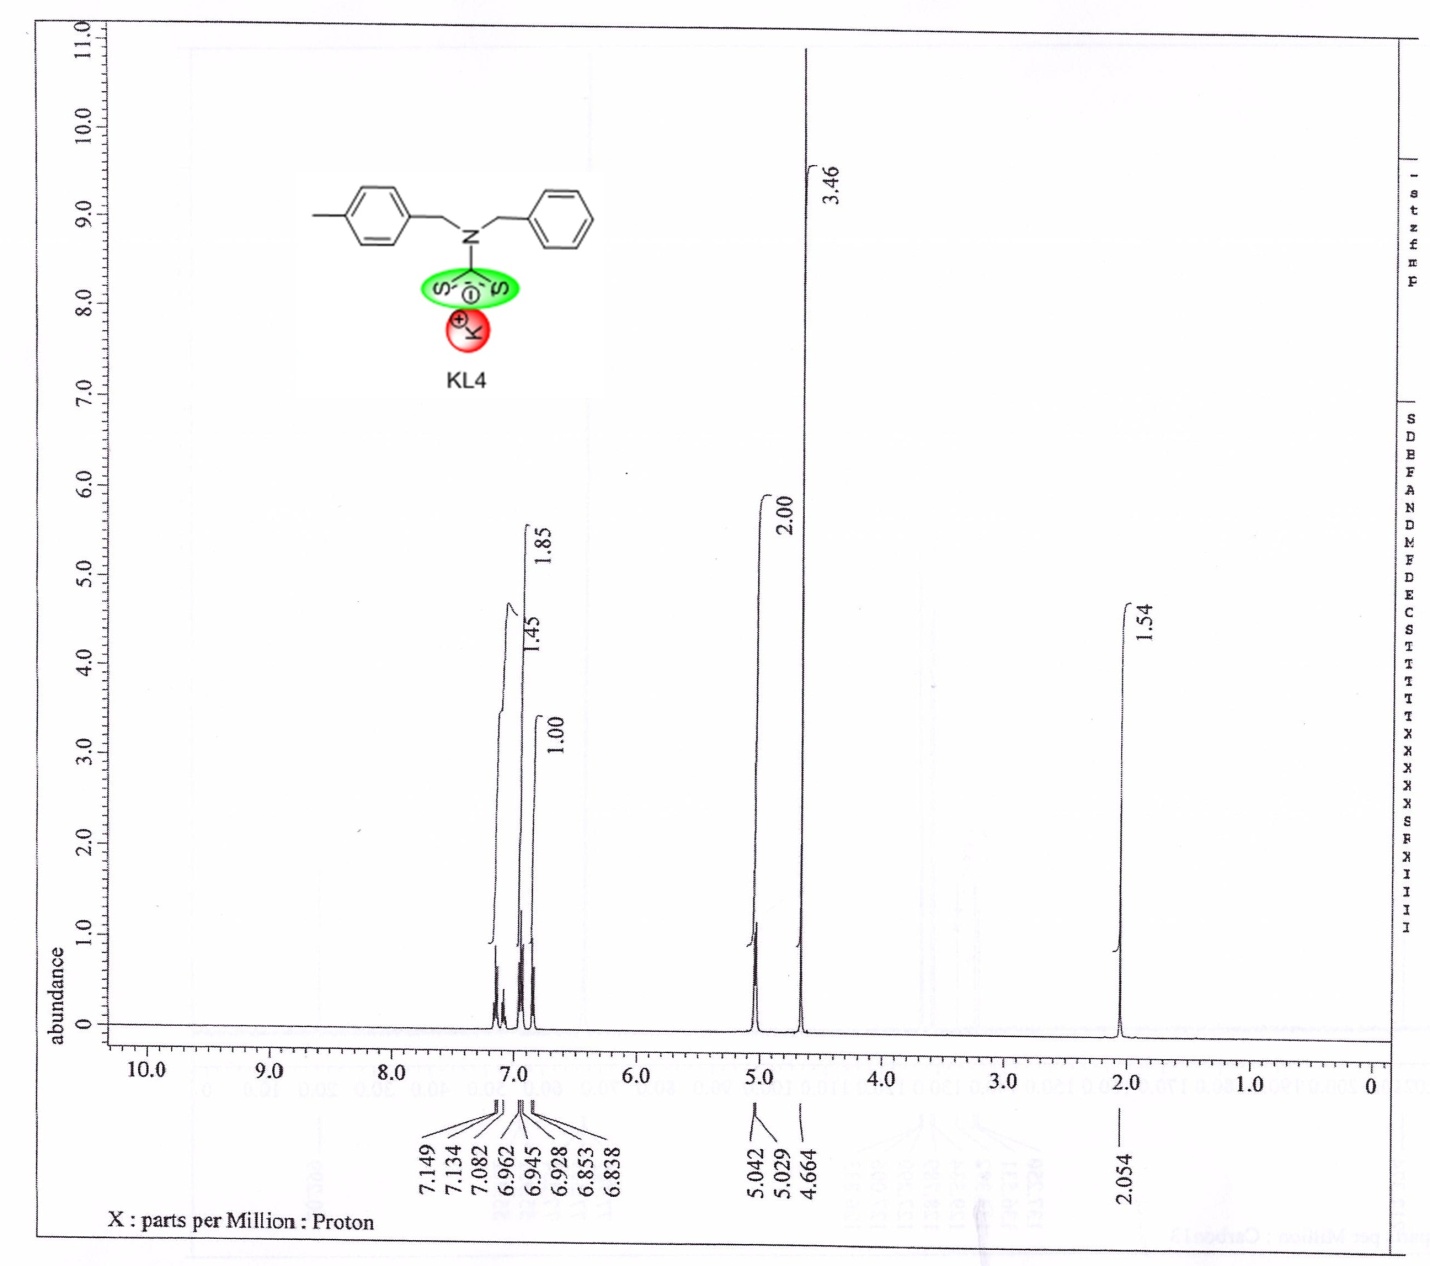


**Figure S7.** 1H NMR spectrum of **KL4** ligand.


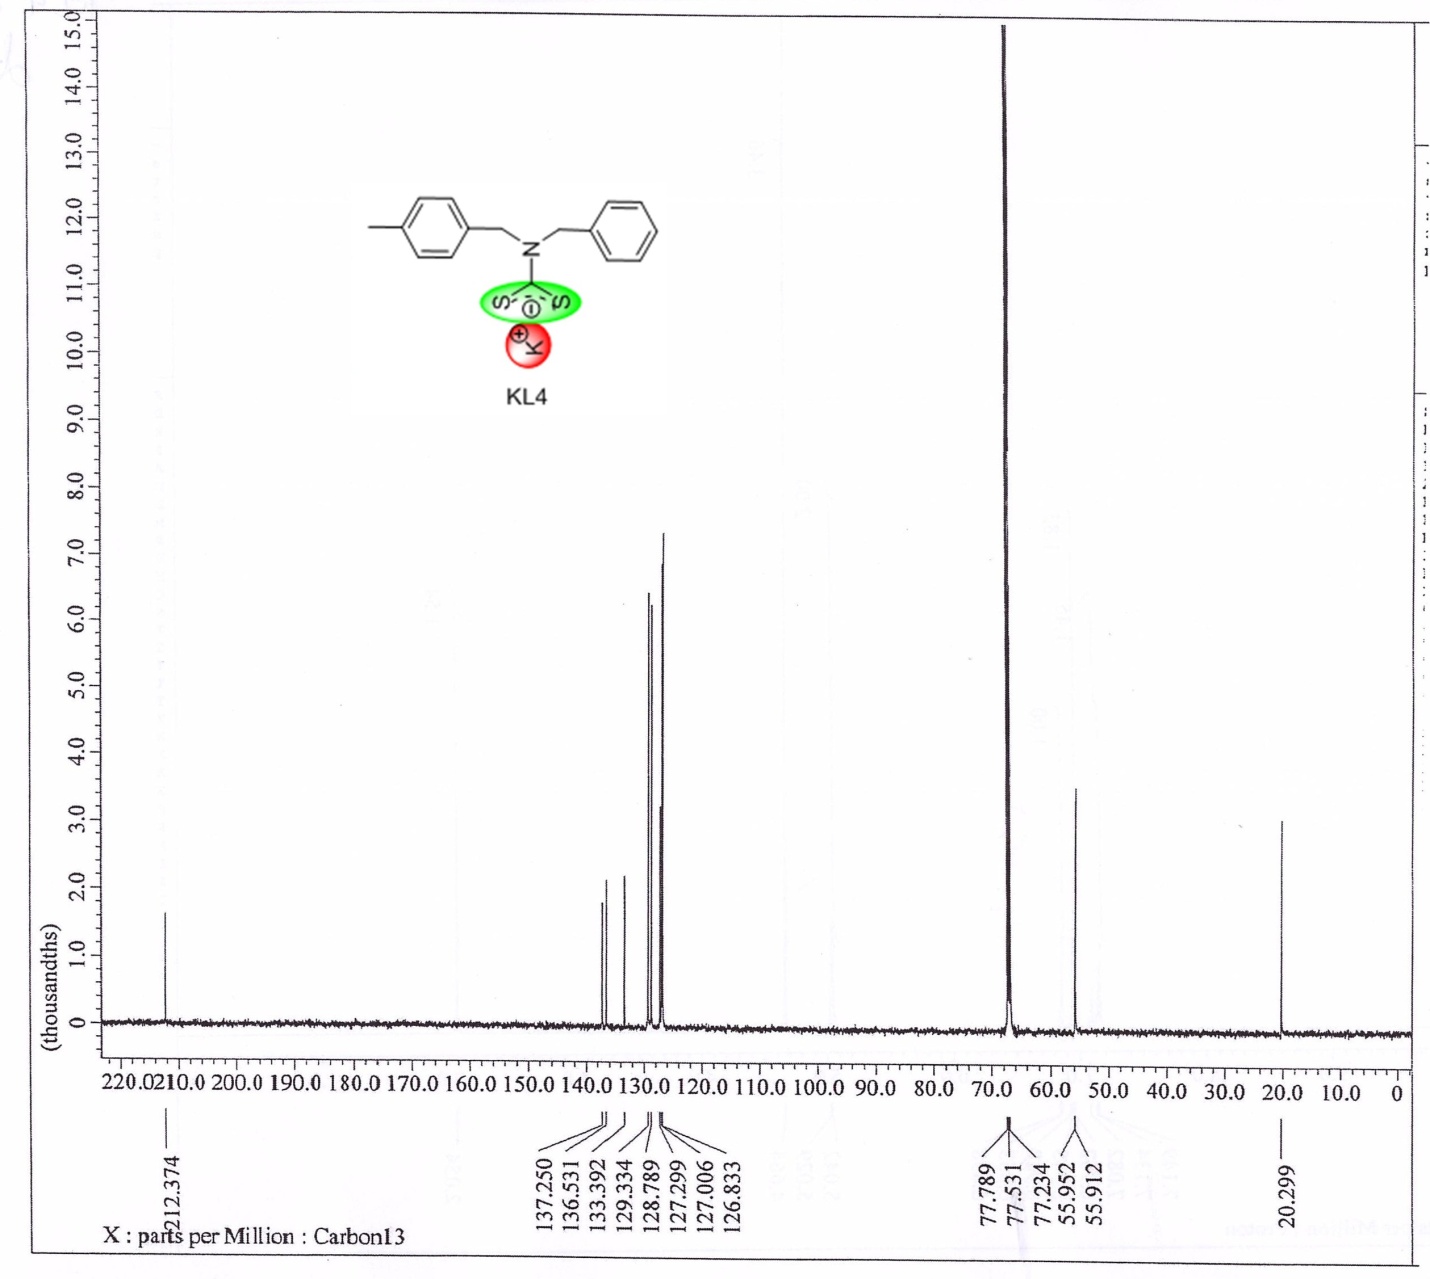


**Figure S8.** 13C NMR spectrum of **KL4** ligand.


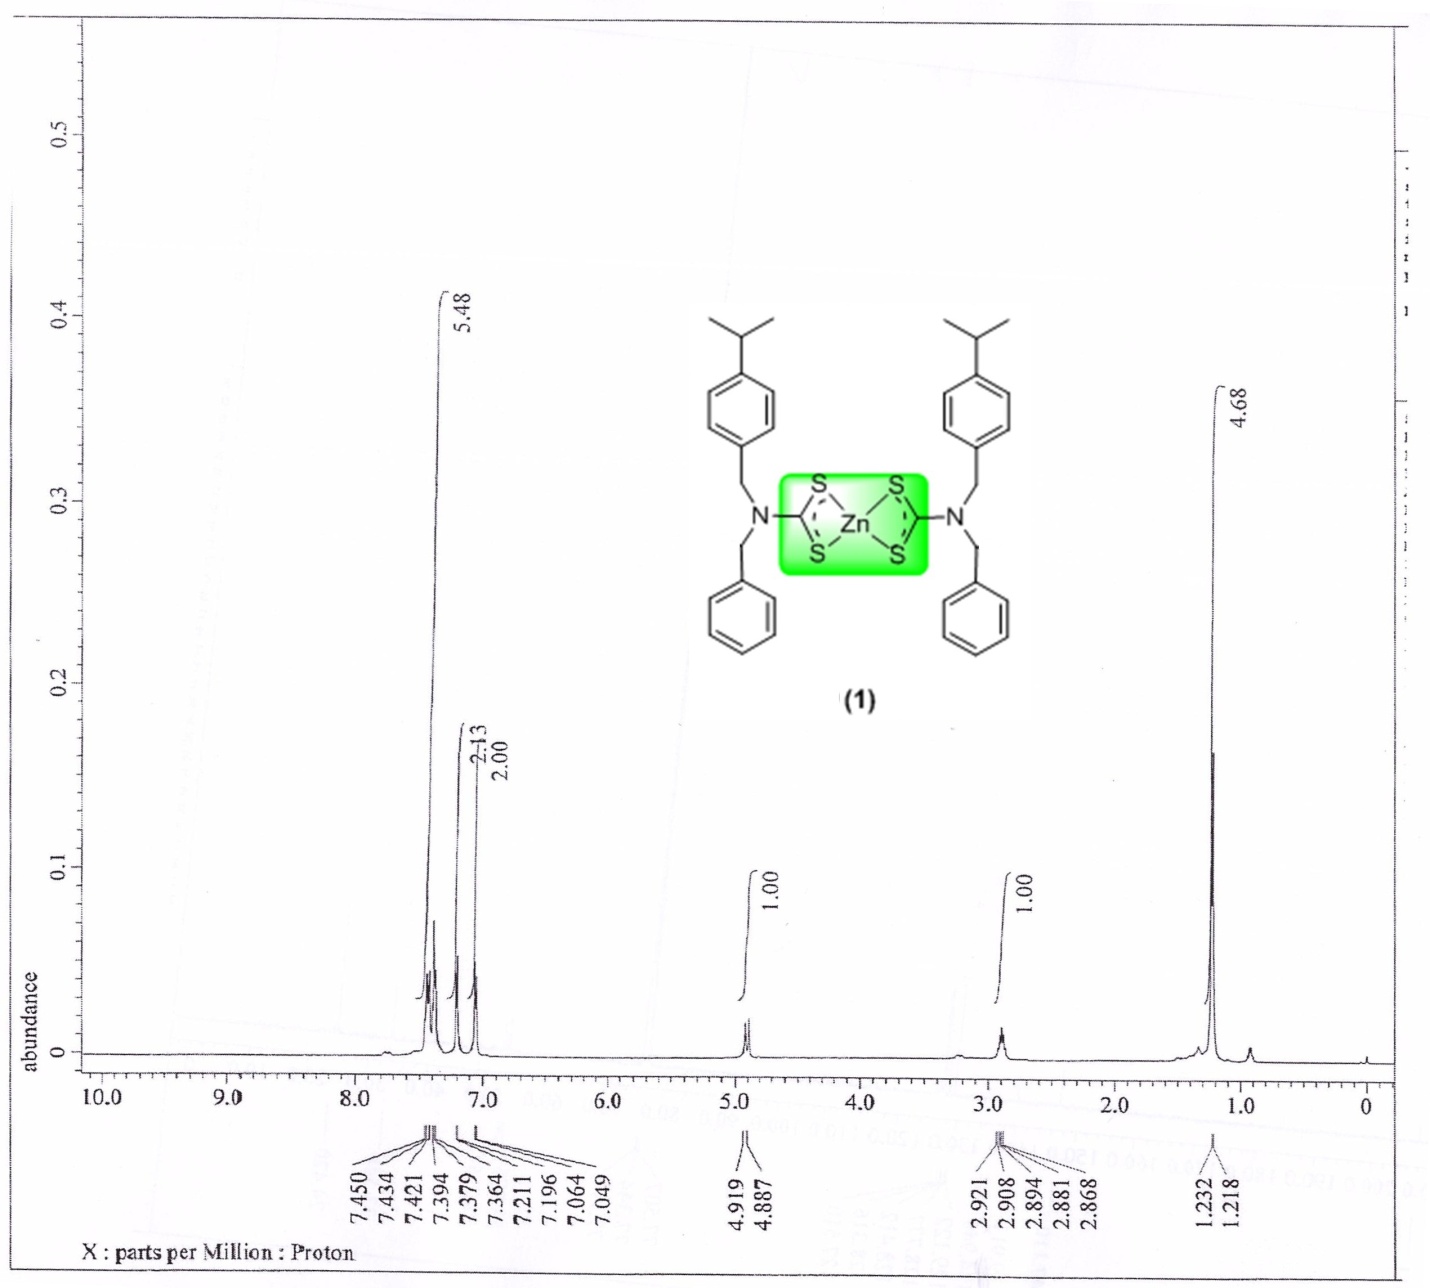


**Figure S9.** 1H NMR spectrum of complex **A1**.


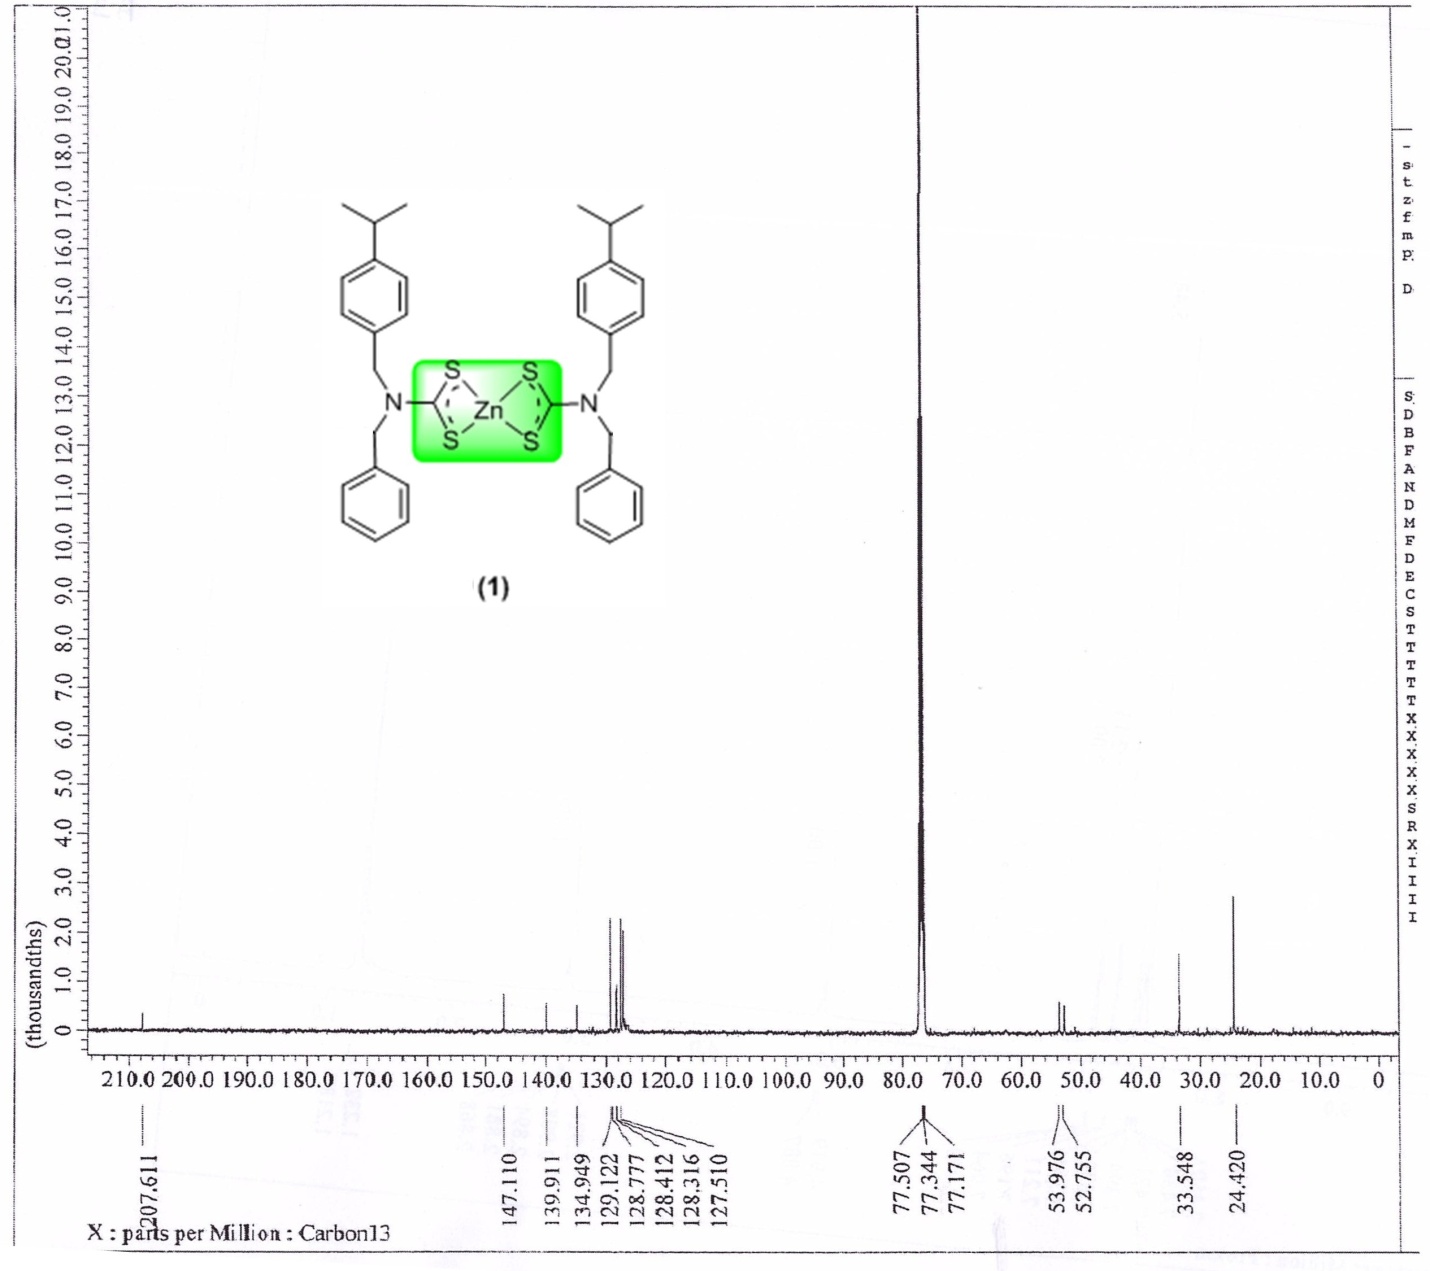


**Figure S10.** 13C NMR spectrum of complex **A1**.


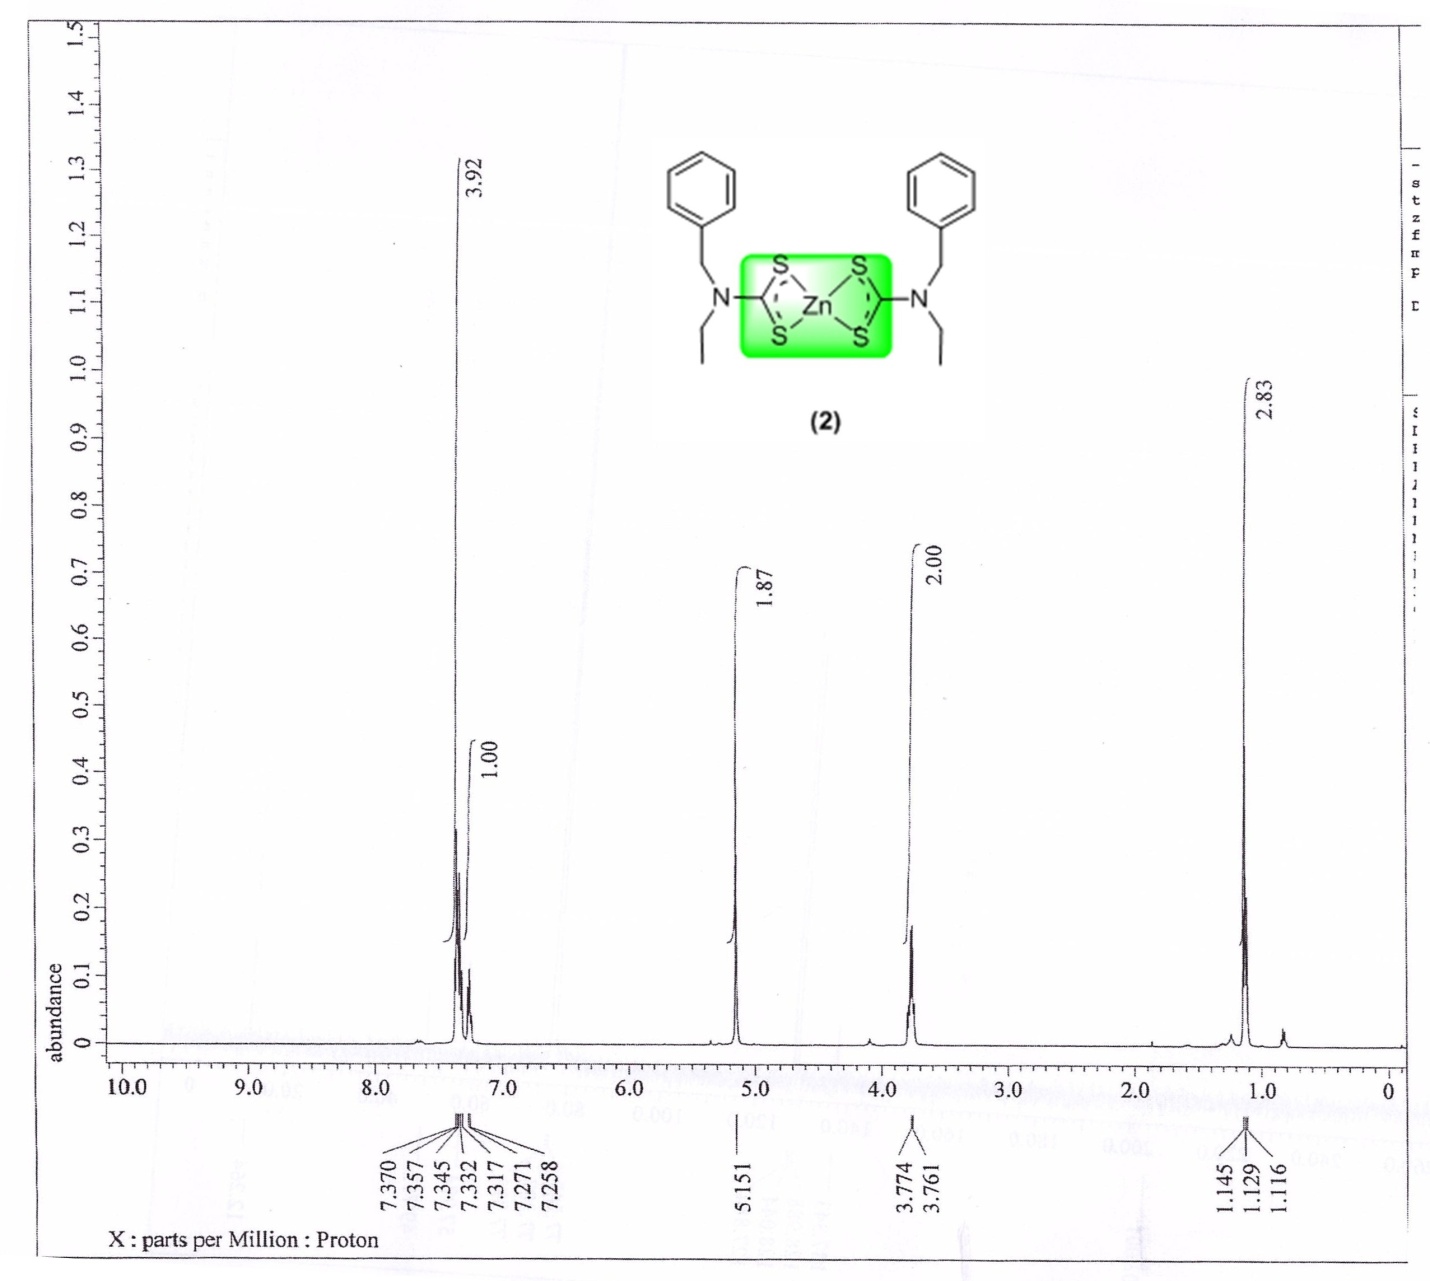


**Figure S11.** 1H NMR spectrum of complex **A2**.


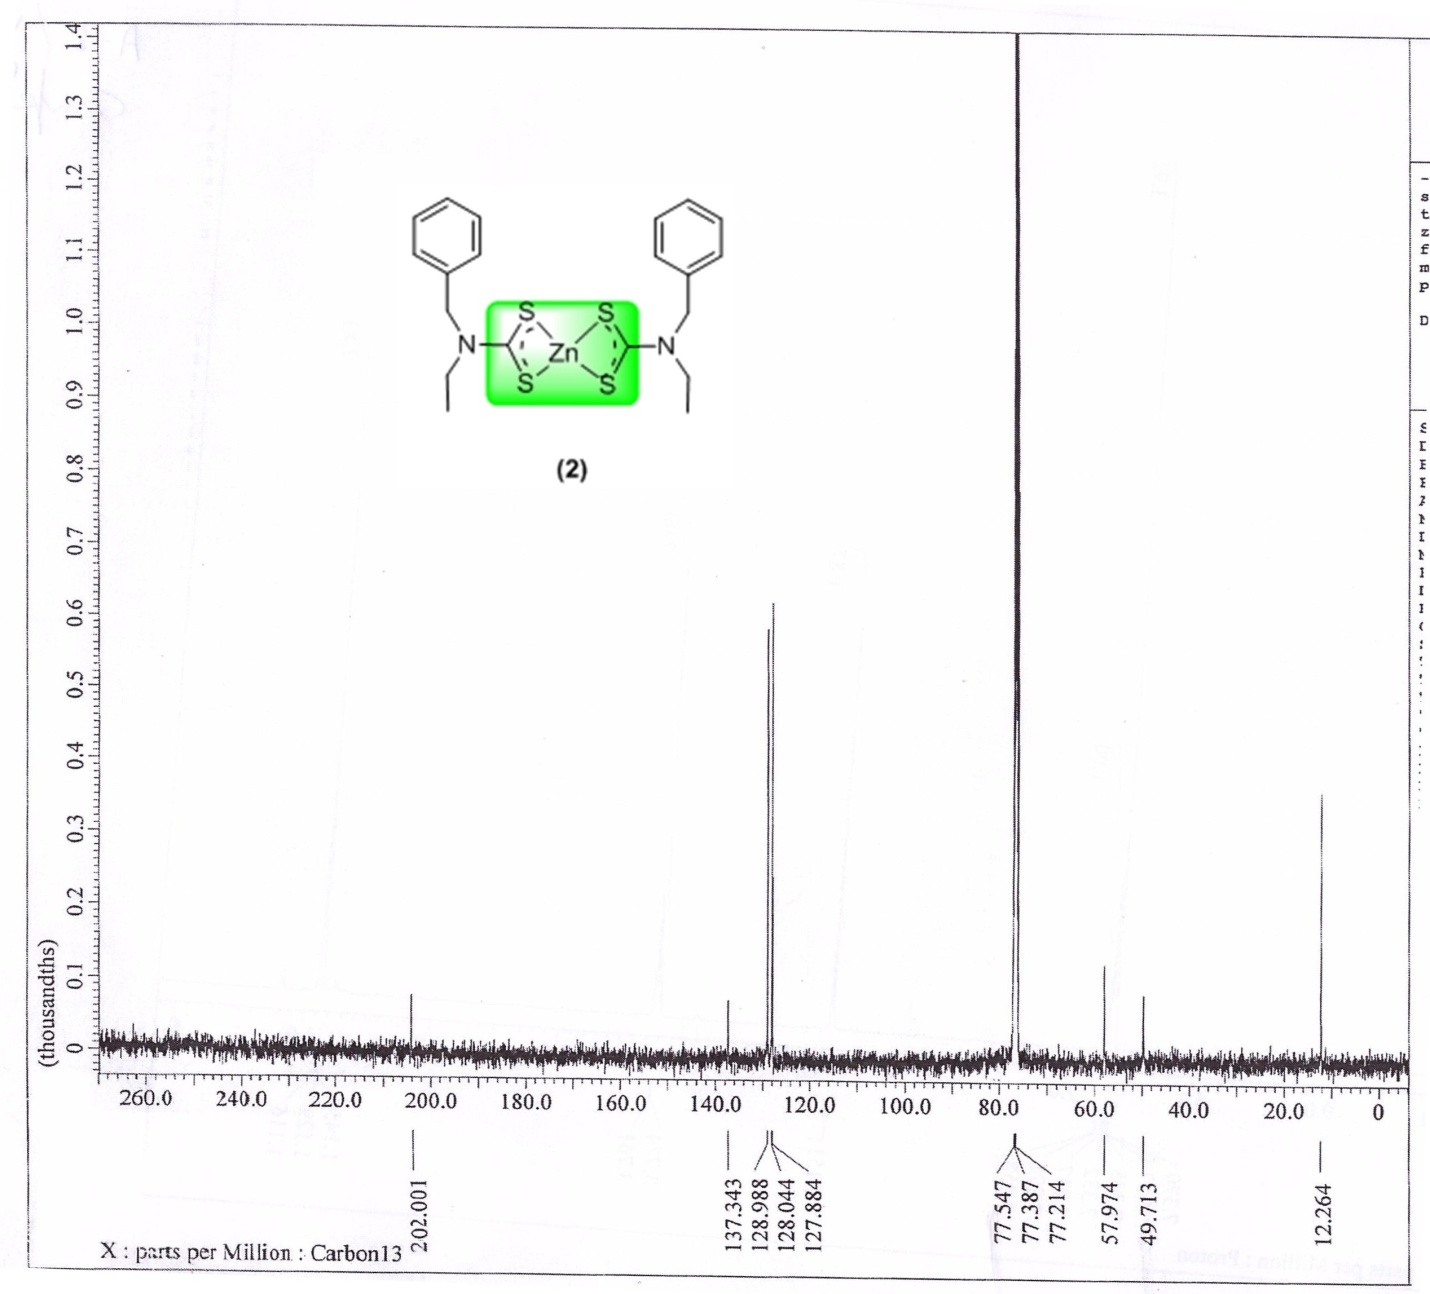


**Figure S12.** 13C NMR spectrum of complex **A2**.


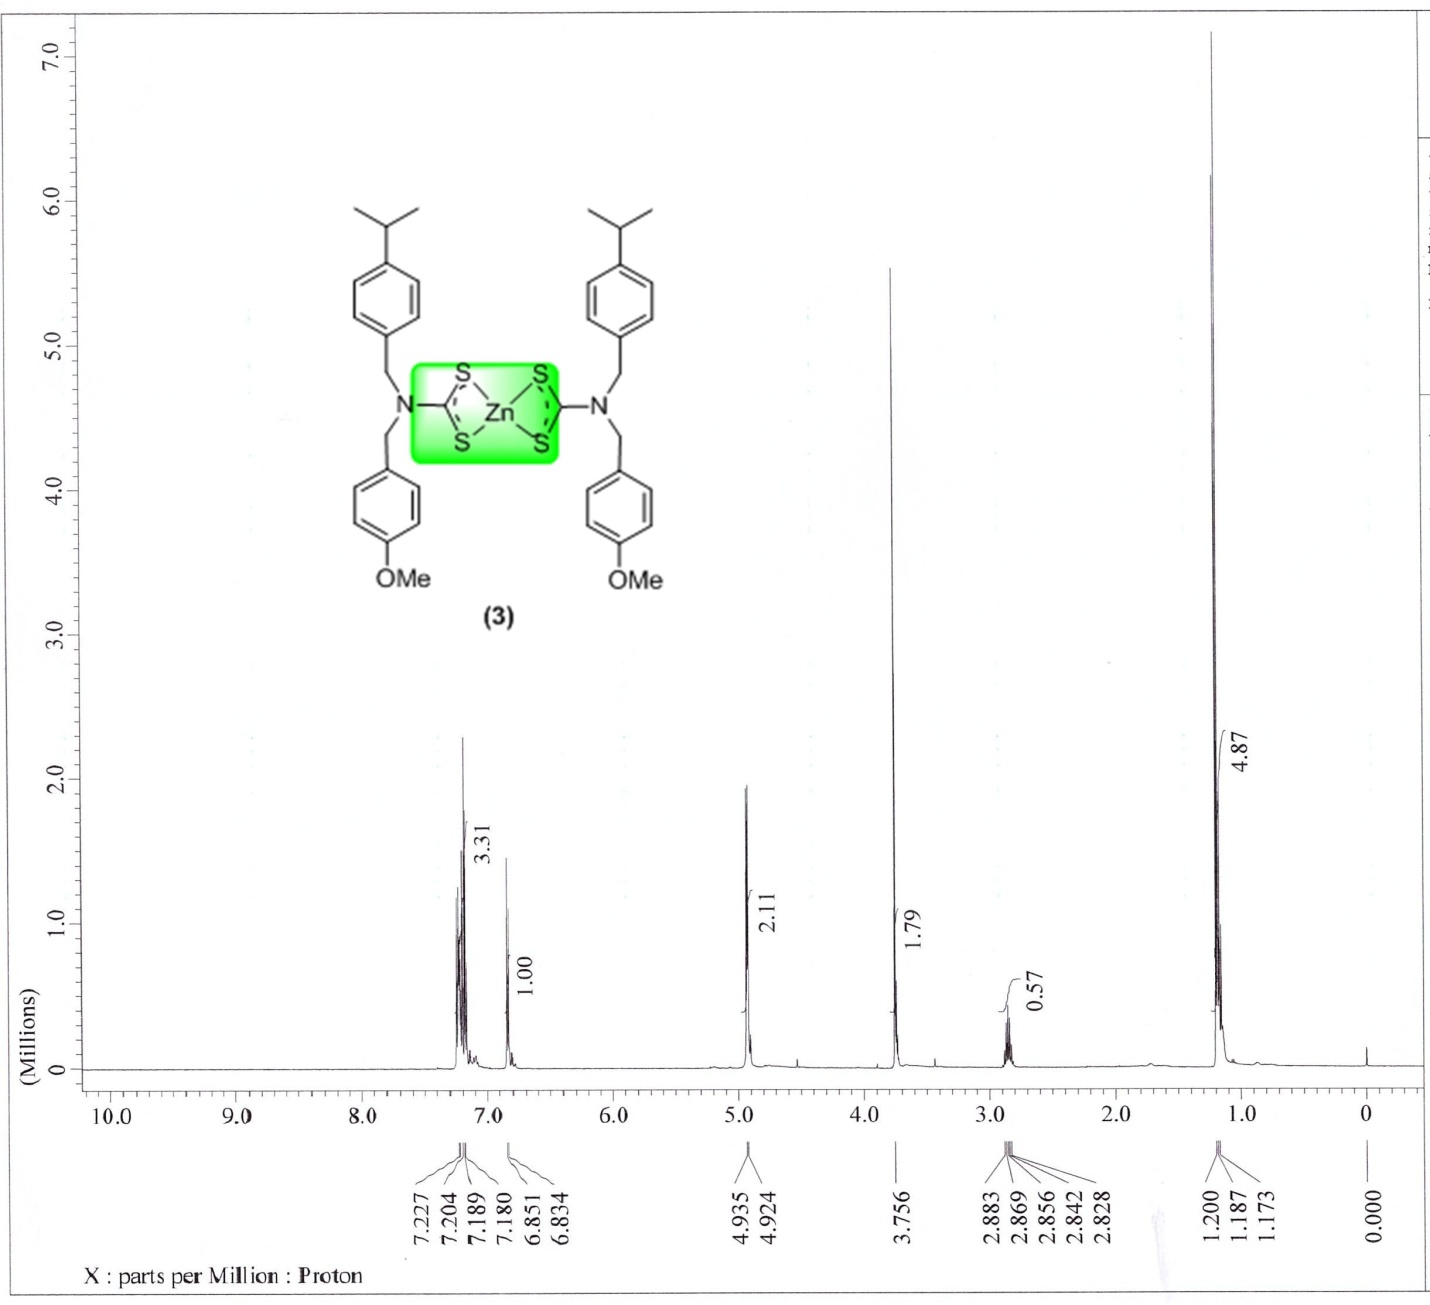


**Figure S13.** 1H NMR spectrum of complex **A3**.


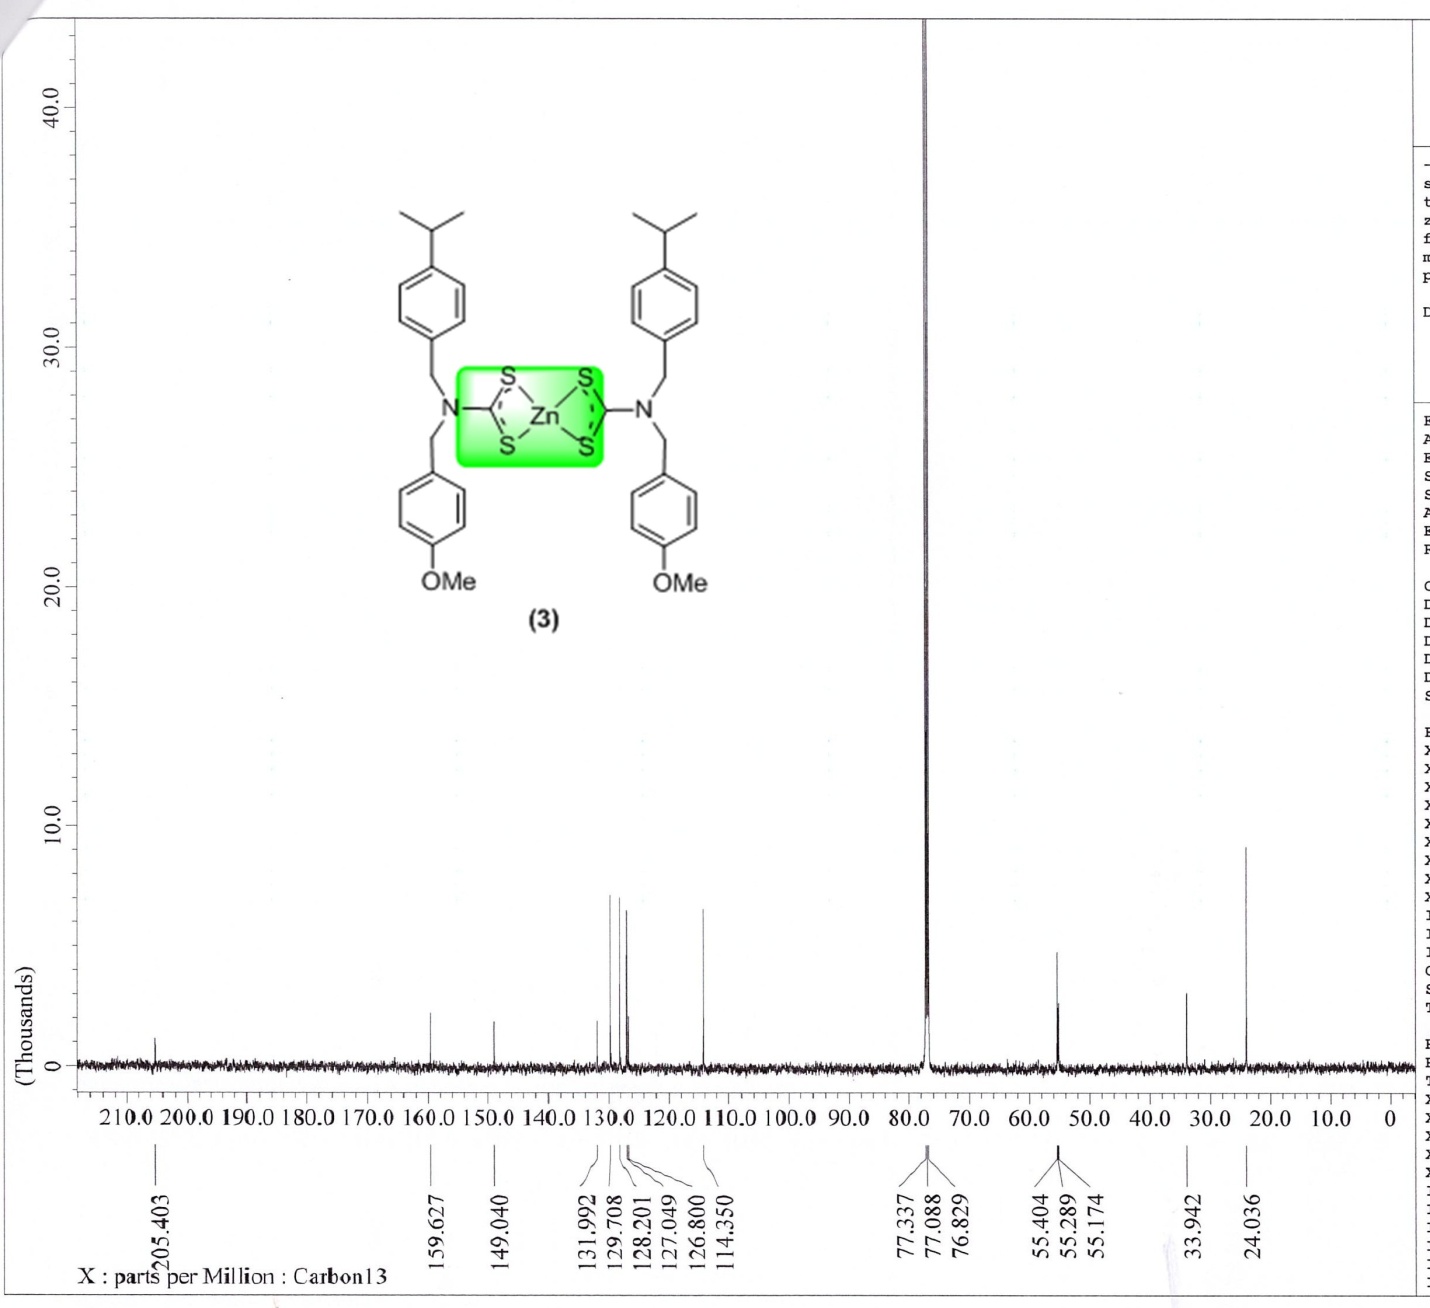


**Figure S14.** 13C NMR spectrum of complex **A3**.


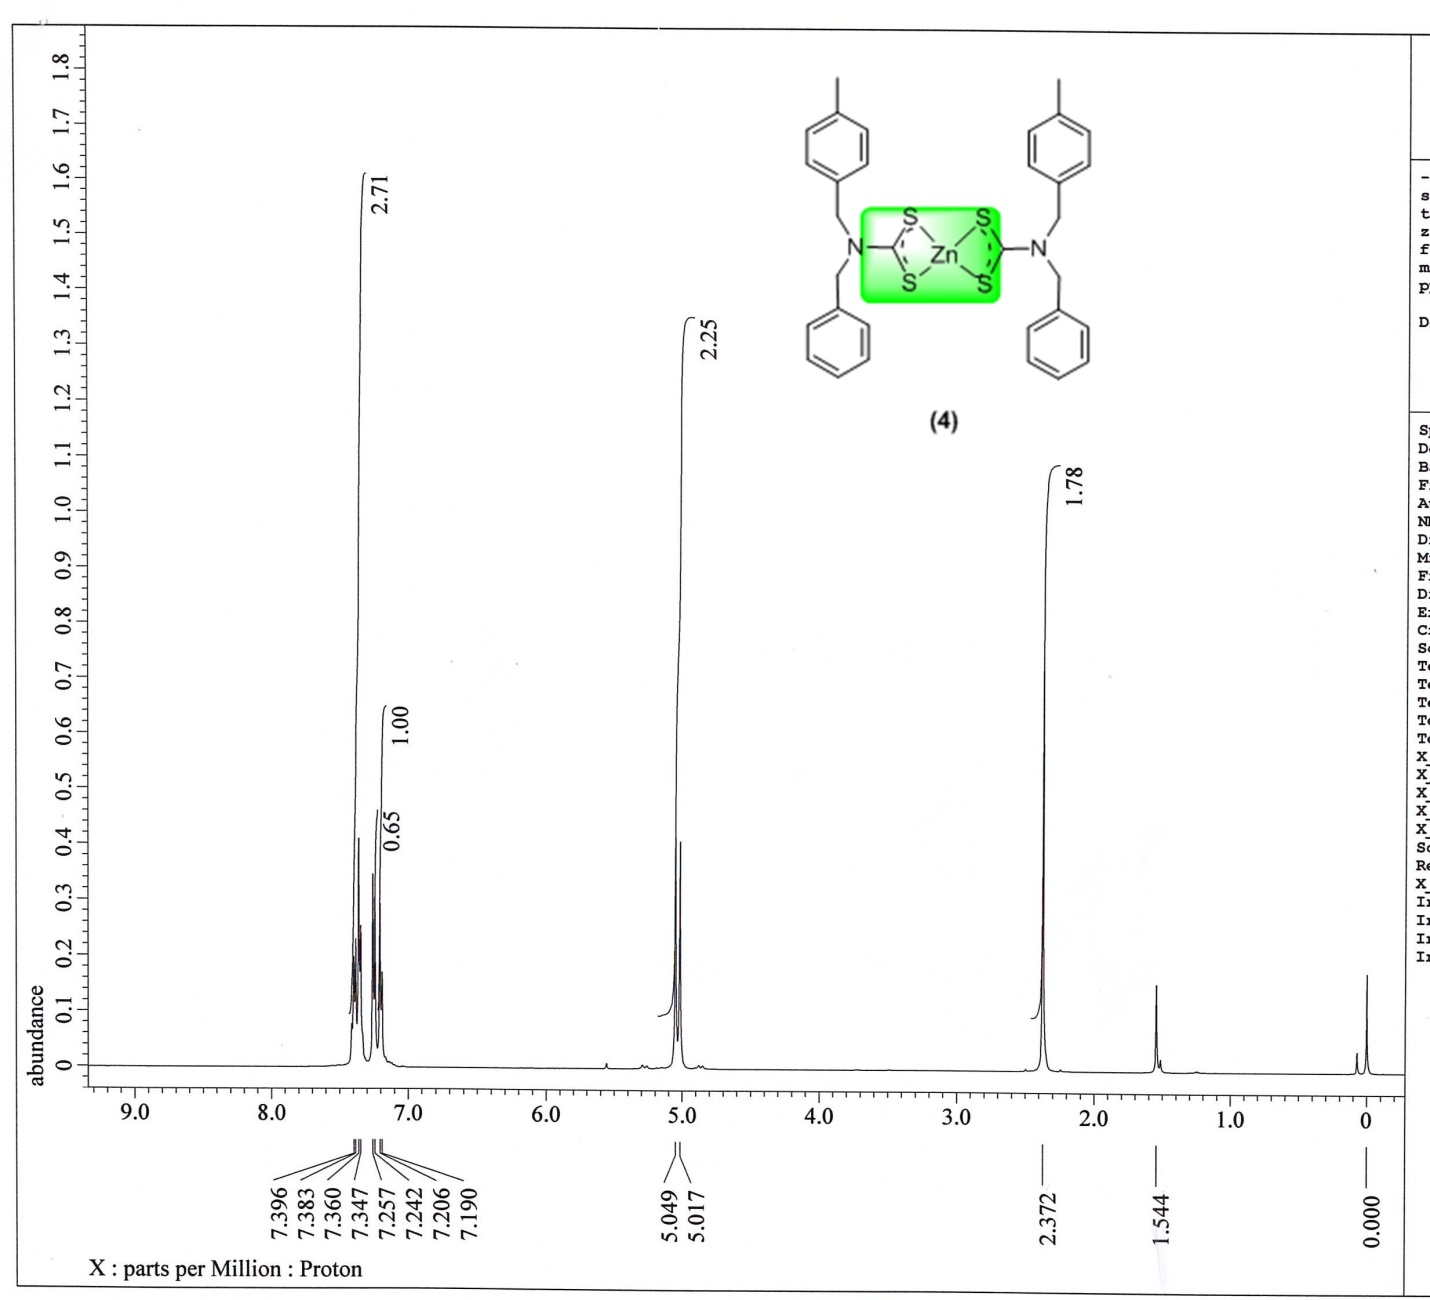


**Figure S15.** 1H NMR spectrum of complex **A4**.


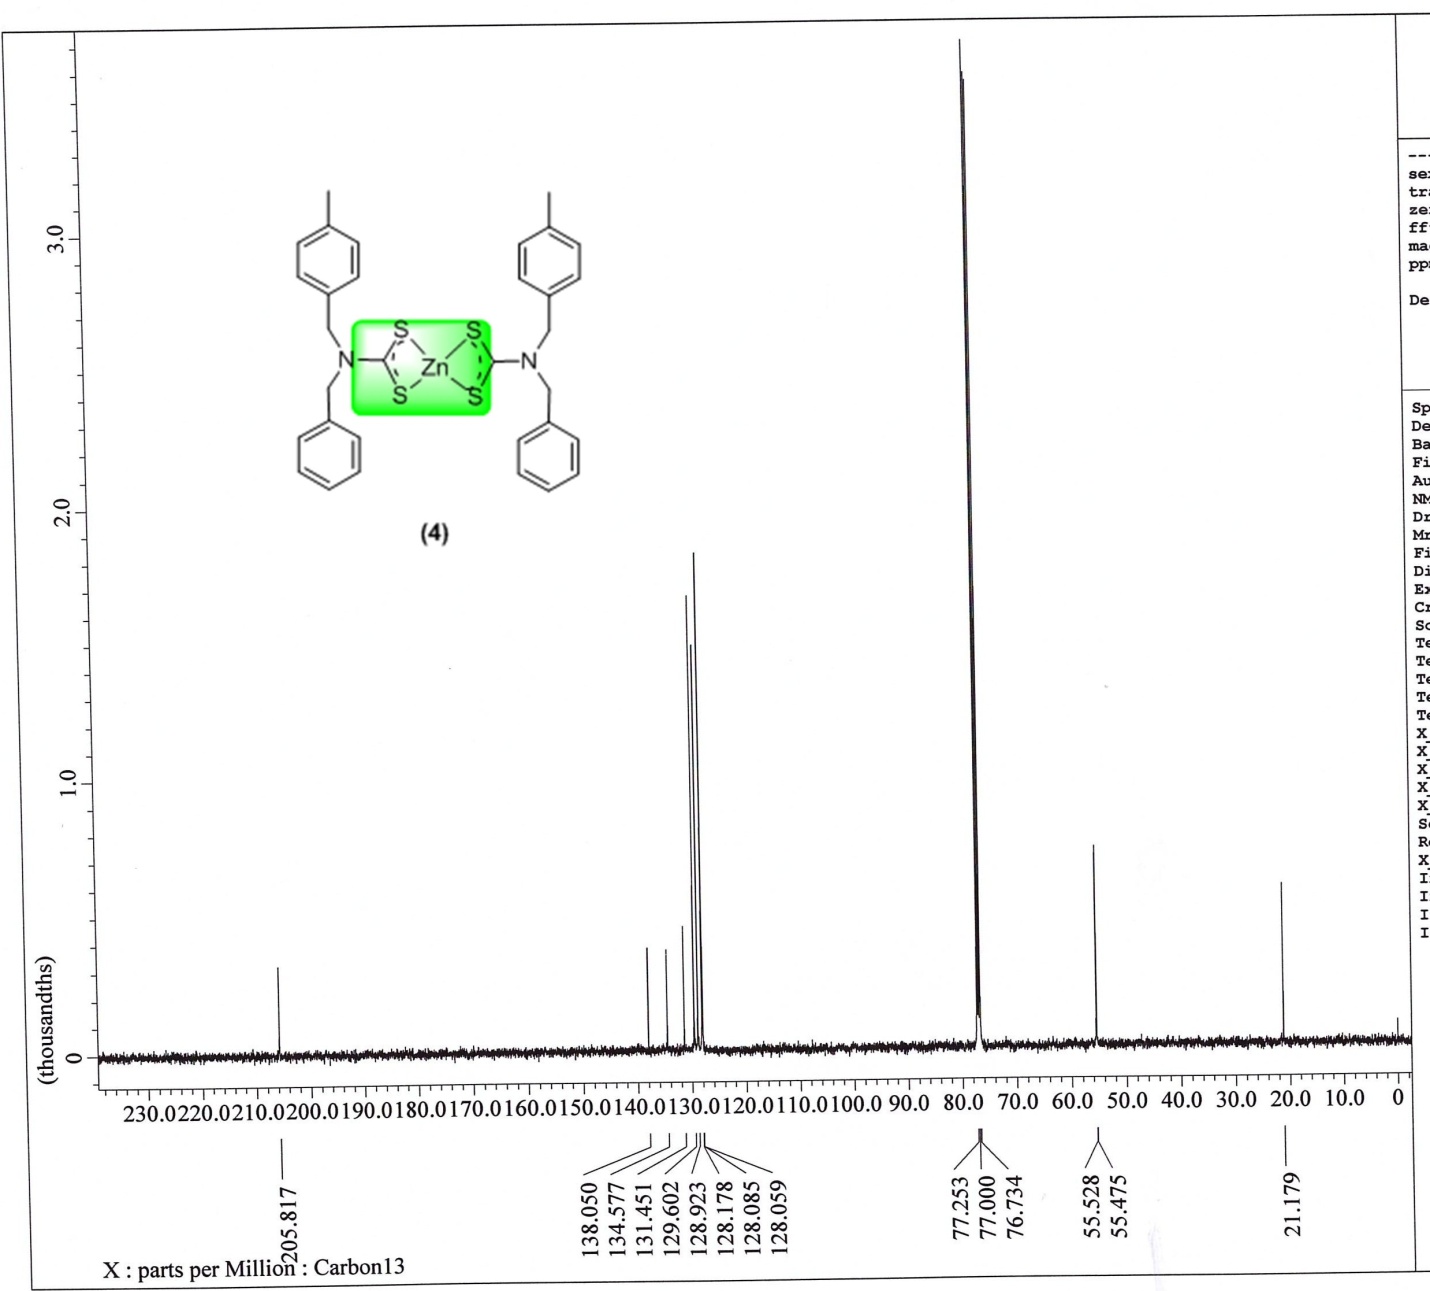


**Figure S16.** 13C NMR spectrum of complex **A4**.


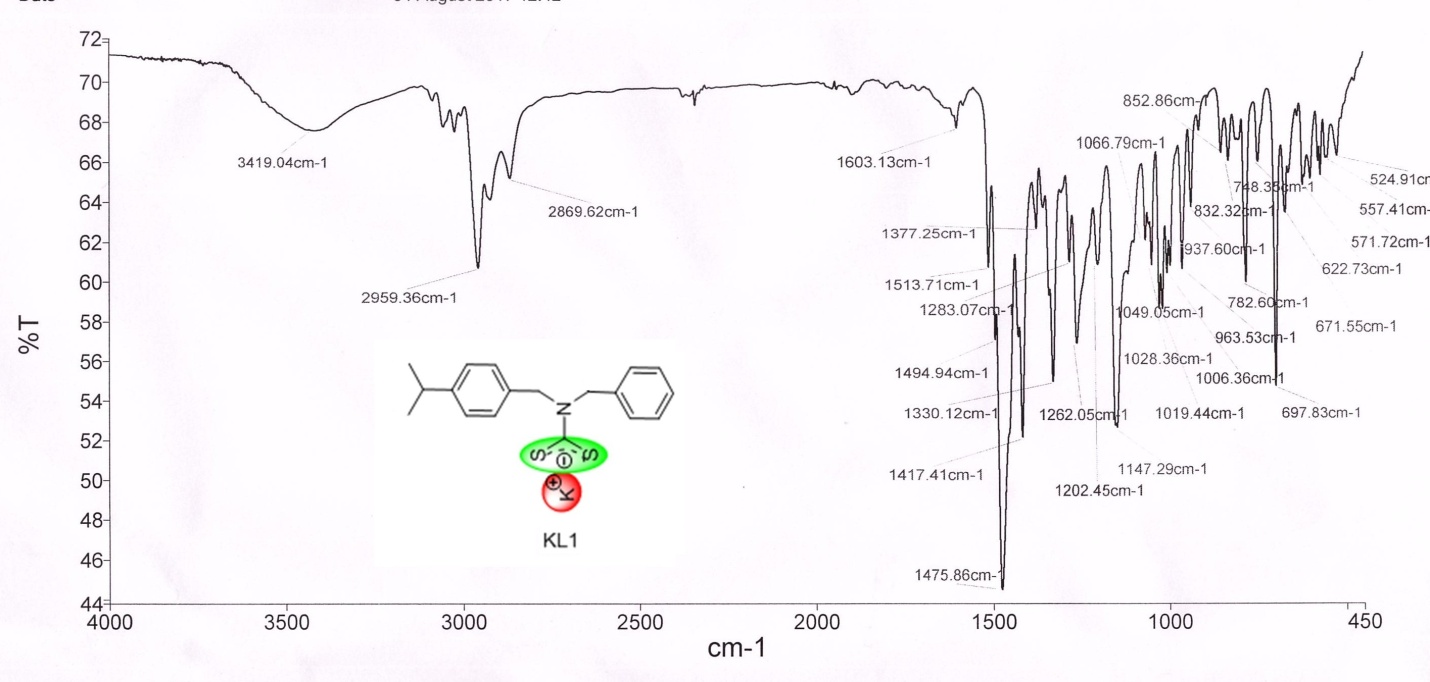


**Figure S17.** FTIR spectra of **KL1** ligand.


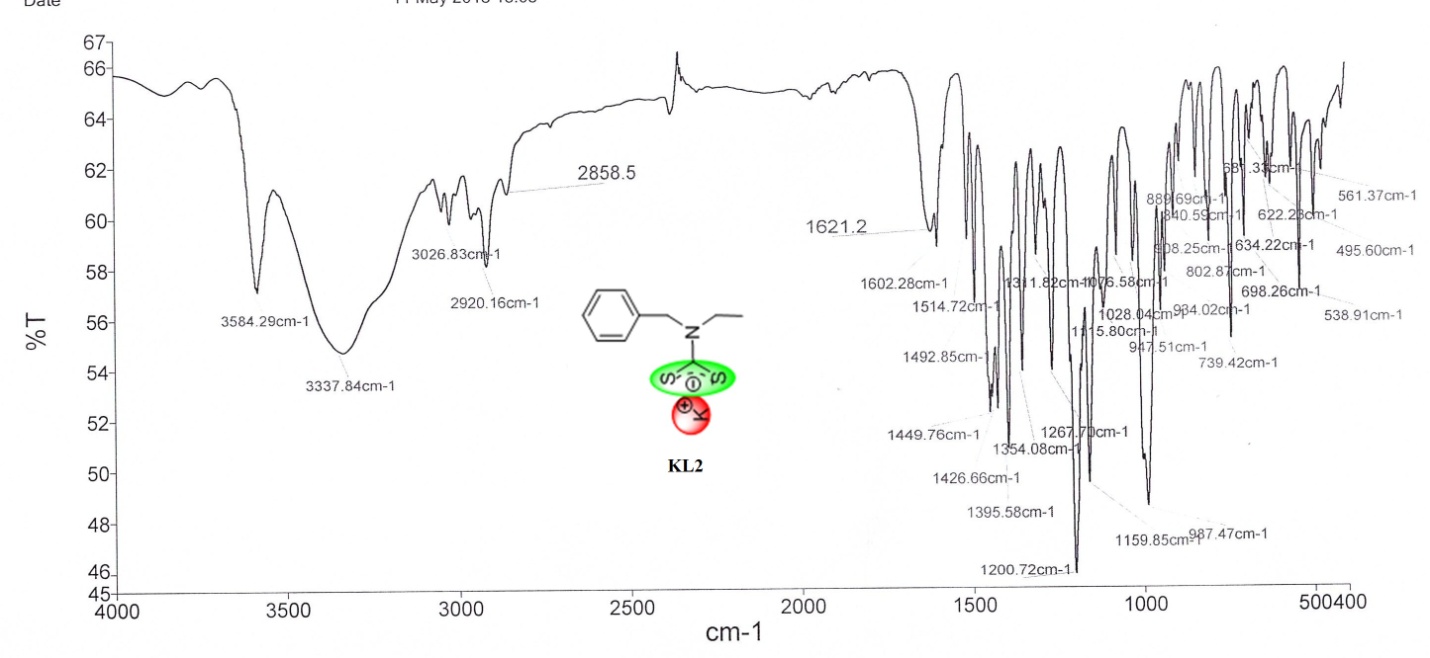


**Figure S18.** FTIR spectra of **KL2** ligand.


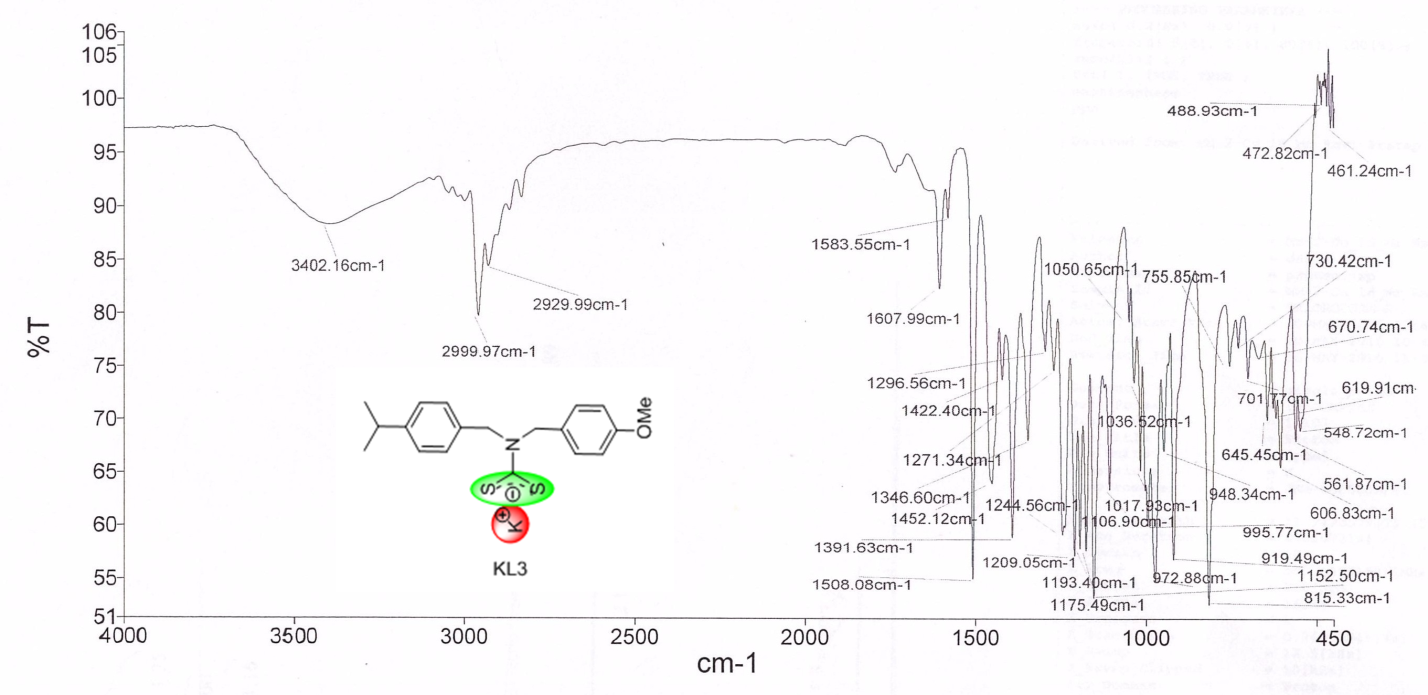


**Figure S19.** FTIR spectra of **KL3** ligand.


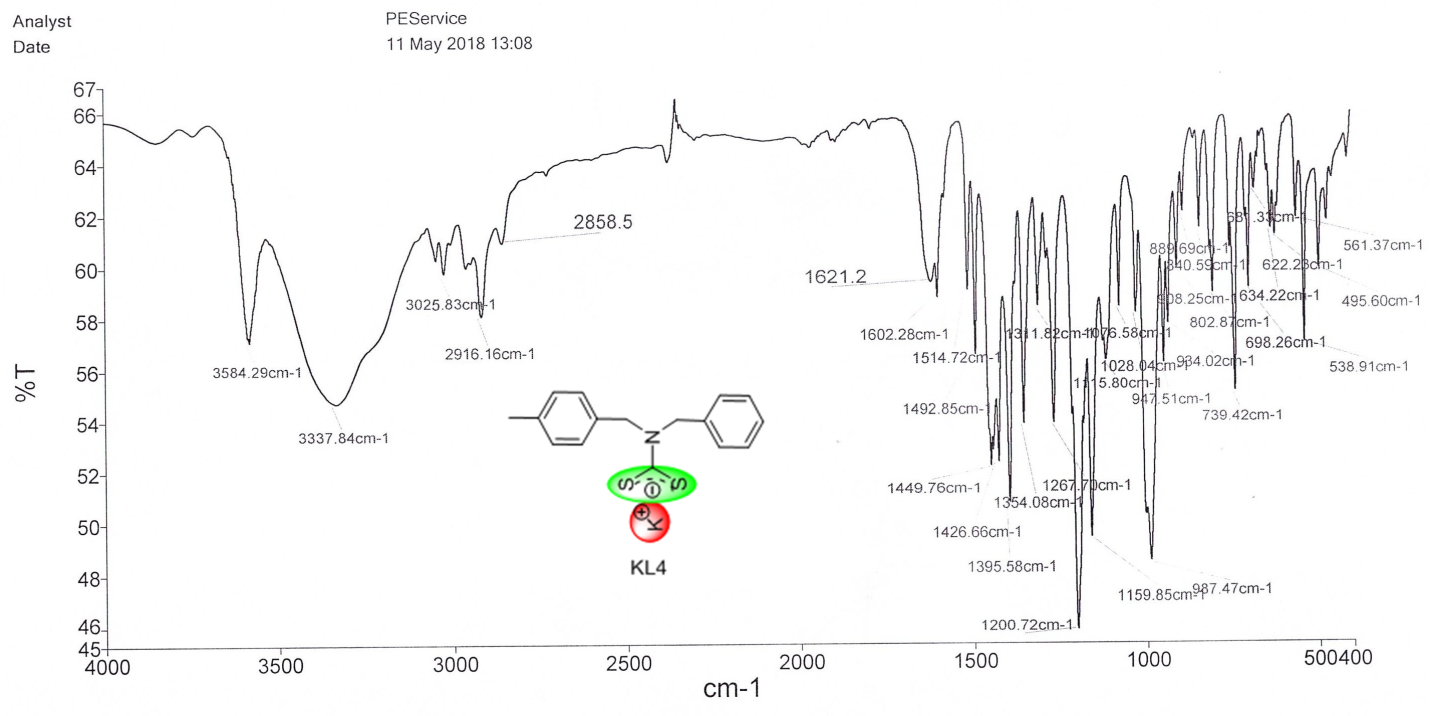


**Figure S20.** FTIR spectra of **KL4** ligand.


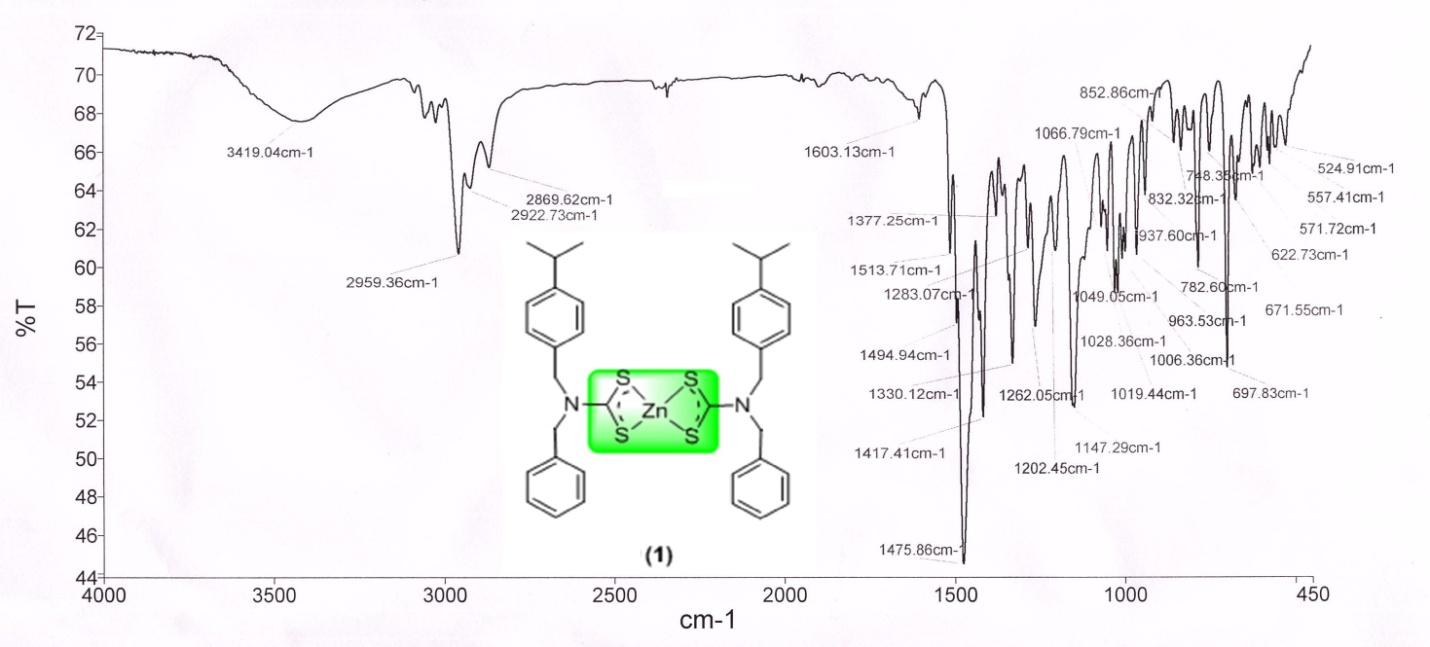


**Figure S21.** FTIR spectra of complex **A1**.


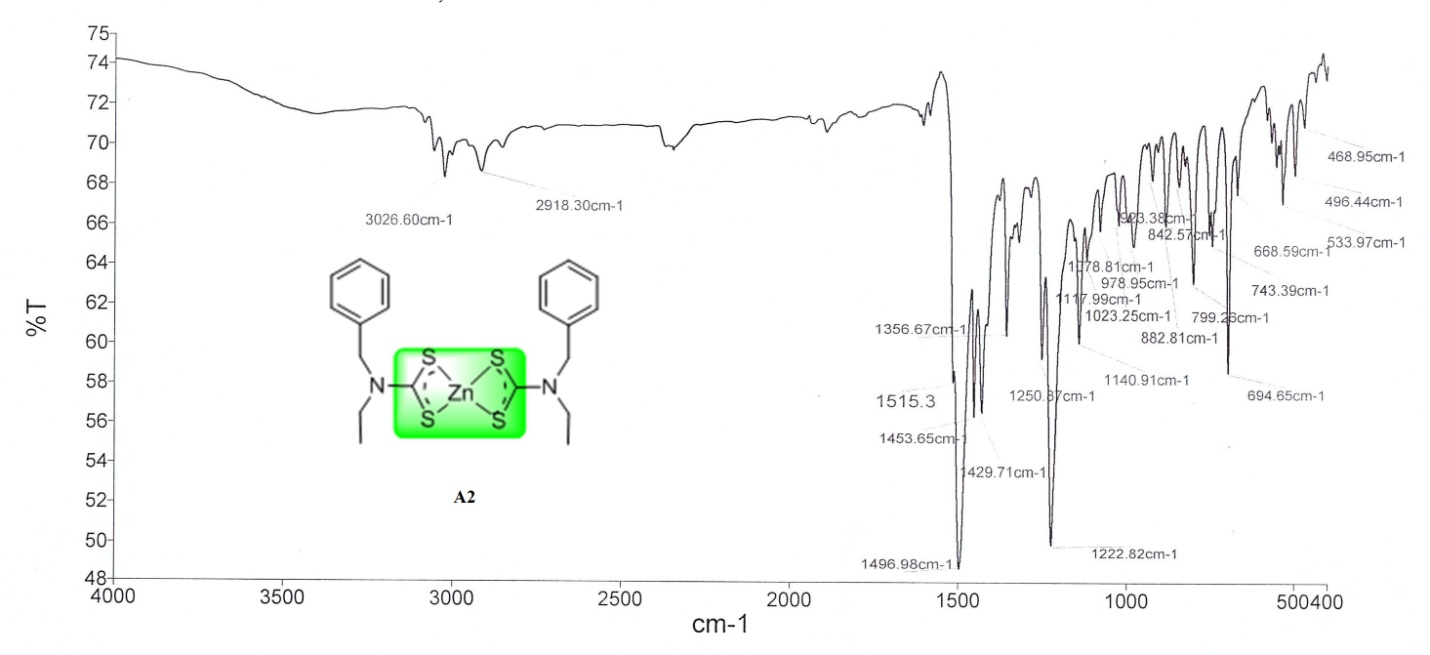


**Figure S22.** FTIR spectra of complex **A2**.


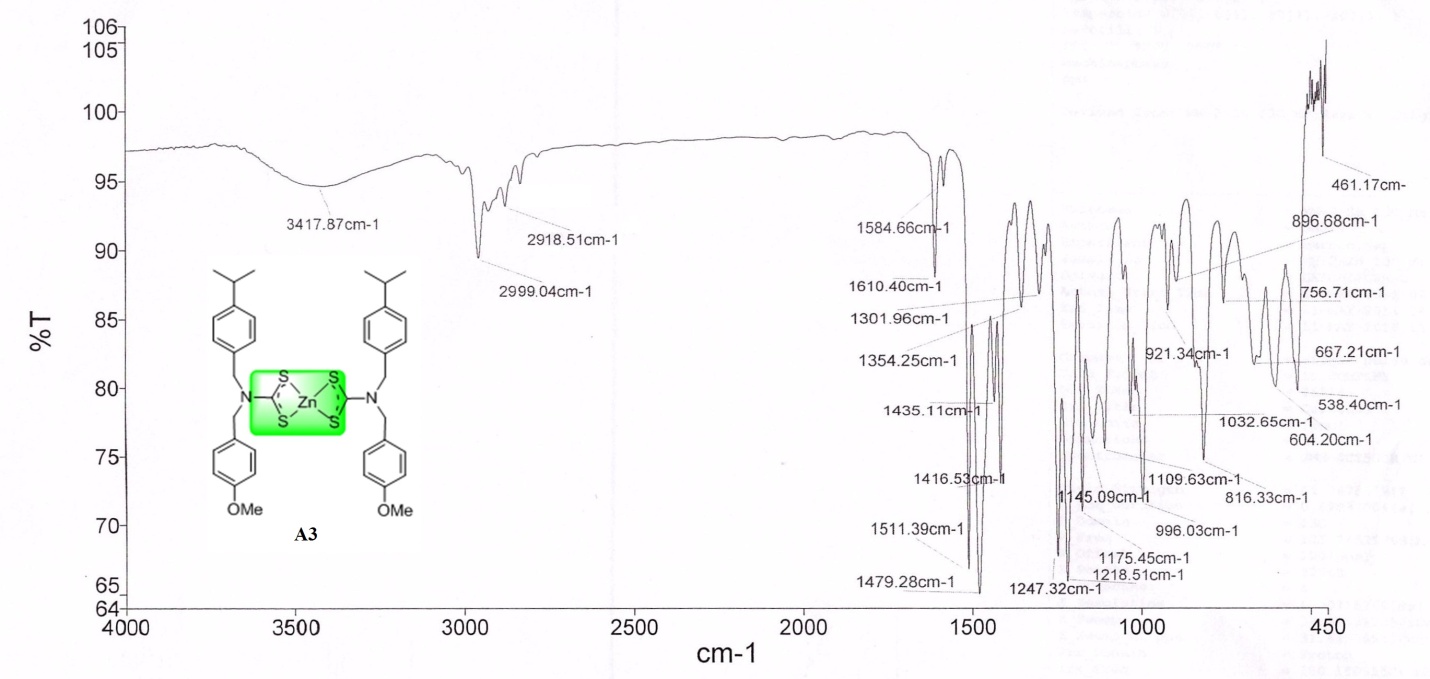


**Figure S23.** FTIR spectra of complex **A3**.


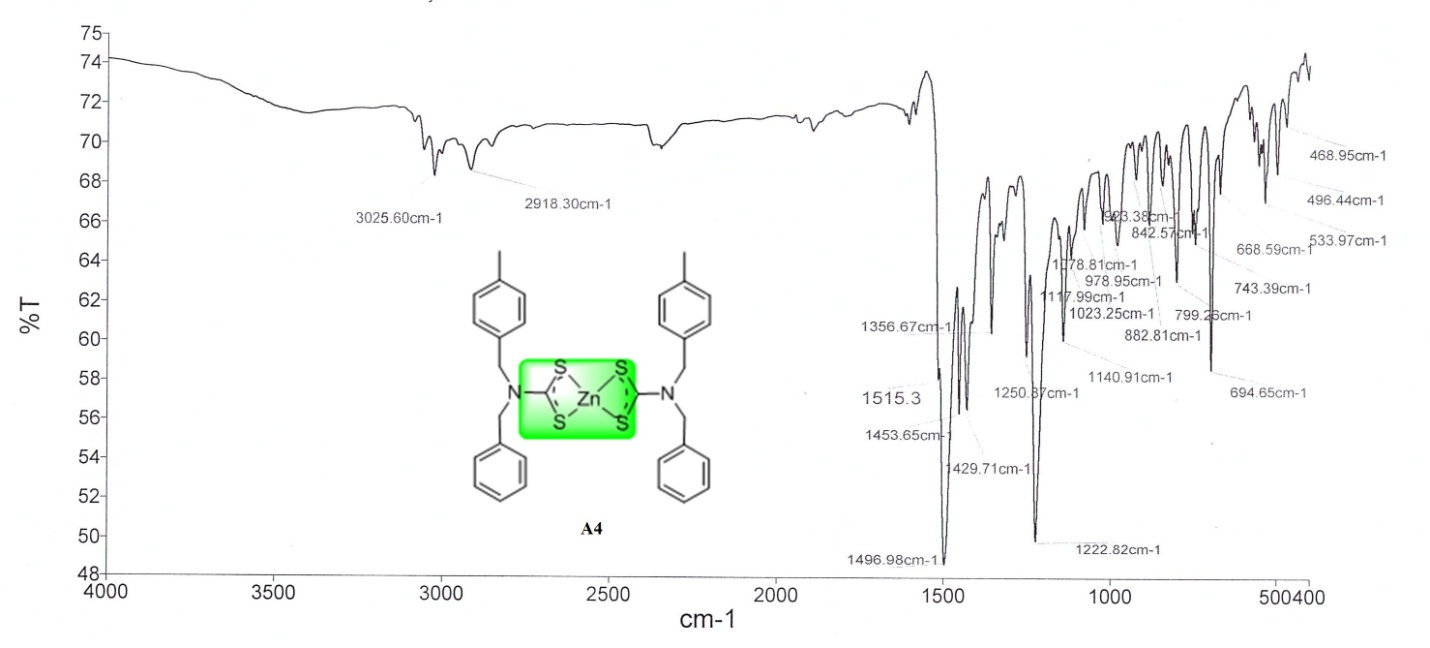


**Figure S24.** FTIR spectra of complex **A4**.


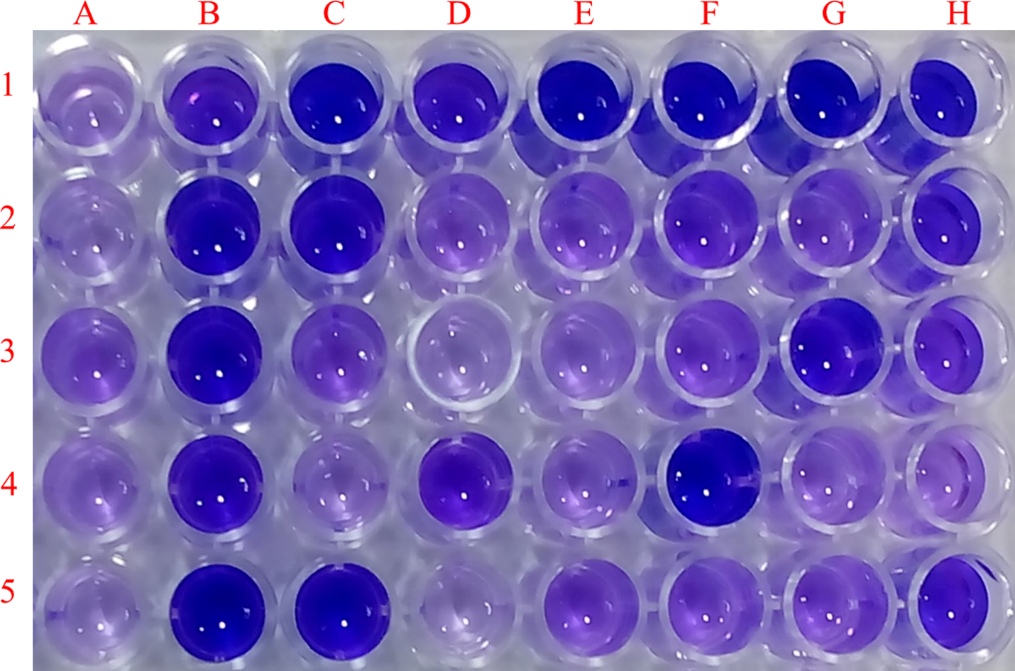


**Figure S25.** Evaluation of antibiofilm activities of complexes.


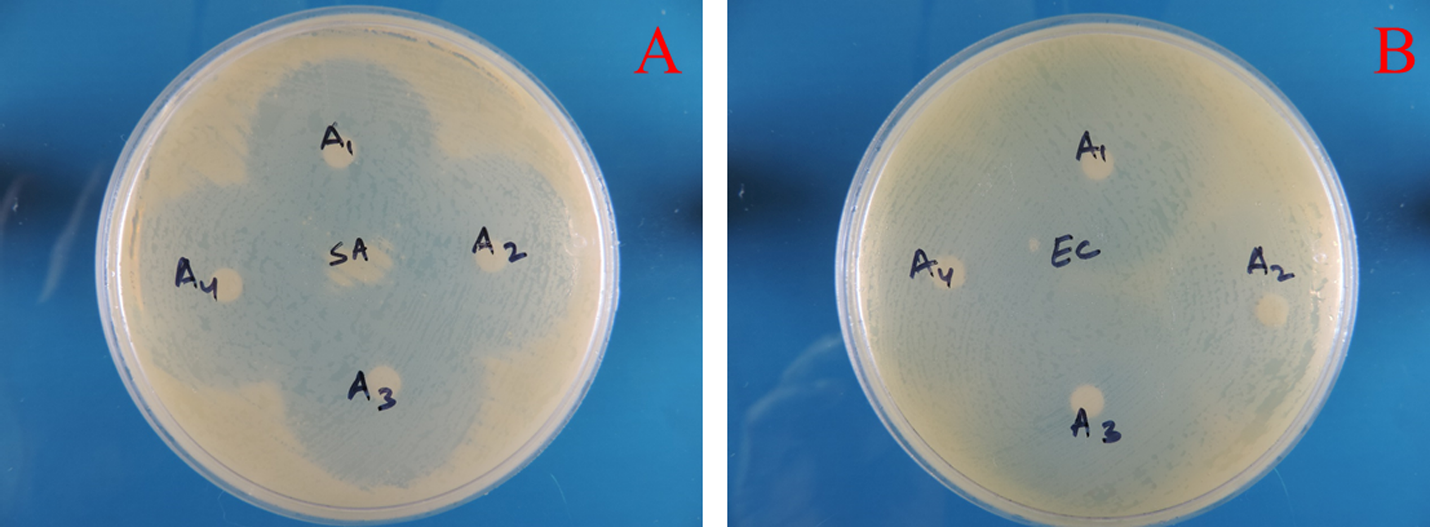


**Figure S26.** Preliminary screening of compound **A2** against *S. aureus* and *E. coli*. The complex concentration increases by 10 units as we move from A1-A2-A3-A4. SA is the symbolic of *S. aureus* while EC is the symbolic of *E. coli*.


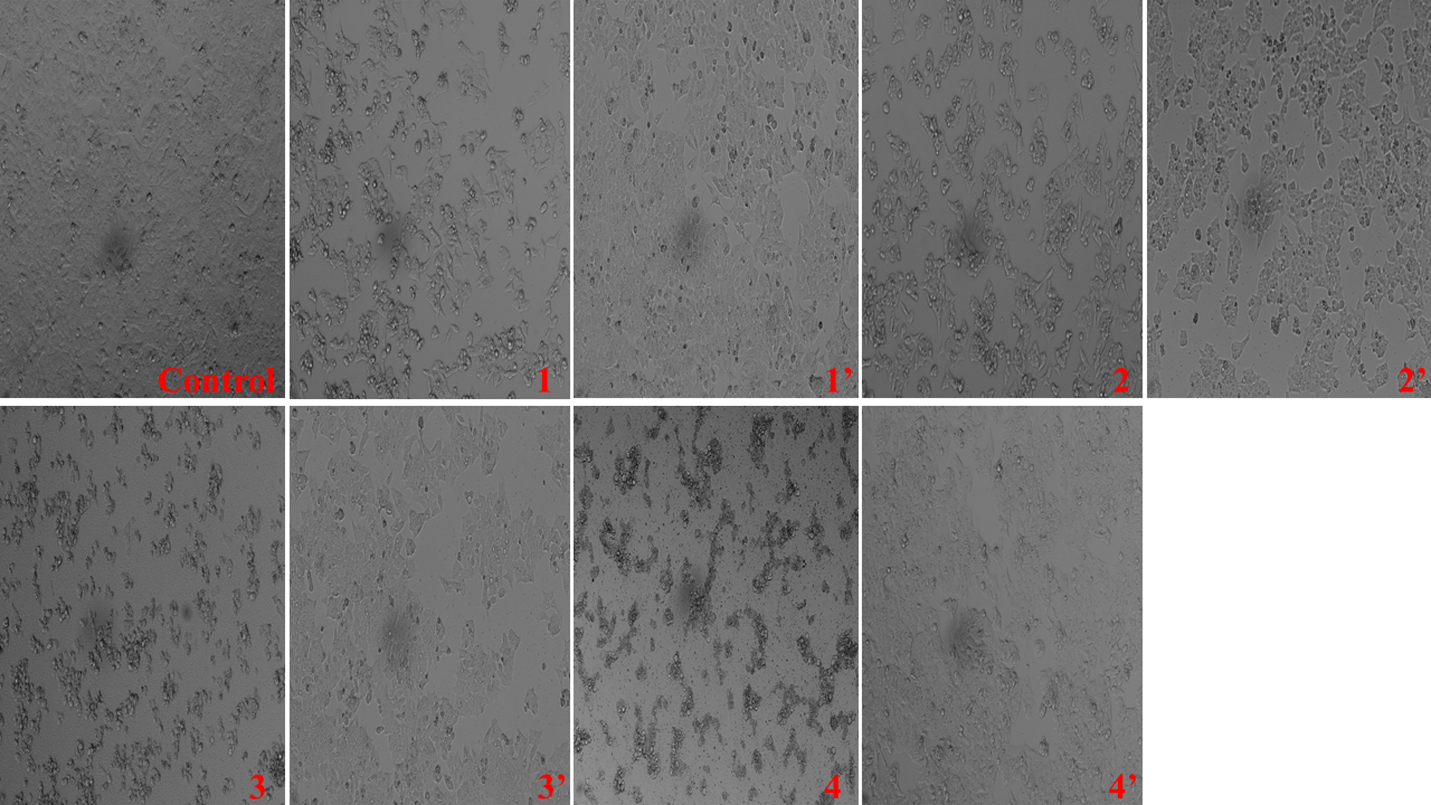


**Figure S27.** Dose dependent antitumor assay of Zn(II) dithiocarbamate complexes against HCT116 cells. Control is the untreated panel that is actually the negative control. (1) Treated HCT116 cells with 16 µg/ml **A3** (1’) Treated HCT116 cells with 16 µg/ml **A2** (2) Treated HCT116 cells with 64 µg/ml **A3** (2’) Treated HCT116 cells with 64 µg/ml **A2** (3) Treated HCT116 cells with 128 µg/ml **A3** (3’) Treated HCT116 cells with 128 µg/ml **A2** (4) Treated HCT116 cells with 256 µg/ml **A3** (4’) Treated HCT116 cells with 256 µg/ml **A2**.
